1 **Title: Pericarp Pigmentation Correlates with Hormones and Intensifies with**  
2 **Continuation of Bud Sport Generations from ‘Red Delicious’**

3

4 **Wen-Fang Li<sup>1</sup>, Juan Mao<sup>1</sup>, Shi-Jin Yang<sup>1</sup>, Zhi-Gang Guo<sup>1</sup>, Zong-Huan Ma<sup>1</sup>,**  
5 **Mohammed Mujitaba Dawuda<sup>1,2</sup>, Cun-Wu Zuo<sup>1</sup>, Ming-Yu Chu<sup>1</sup>, Bai-Hong**  
6 **Chen<sup>1\*</sup>**

7

8 <sup>1</sup> College of Horticulture, Gansu Agricultural University, Lanzhou 730070, PR China

9 <sup>2</sup> Department of Horticulture, FoA, University for Development Studies, P. O. Box  
10 TL 1882, Tamale, Ghana

11

12 **\*Corresponding author:** [bhch@gsau.edu.cn](mailto:bhch@gsau.edu.cn)

13

14 **Email addresses:** [1304784689@qq.com](mailto:1304784689@qq.com); [maojuan-81@163.com](mailto:maojuan-81@163.com);

15 [1947919171@qq.com](mailto:1947919171@qq.com); [3148123508@qq.com](mailto:3148123508@qq.com); [mazohu@163.com](mailto:mazohu@163.com);

16 [mmdawuda@yahoo.com](mailto:mmdawuda@yahoo.com); [zuocunwu2006@126.com](mailto:zuocunwu2006@126.com); [chu.my@foxmail.com](mailto:chu.my@foxmail.com)

17

18 **Running title:** Pericarp color correlates with hormones

19

20 **KEYWORDS** apple, ‘Red Delicious’, bud sport, mutant, pericarp, pigmentation,  
21 RNA-seq, hormone

22

23 **ABSTRACT** Bud sport mutants of apple (*Malus domestica* Borkh.) trees with a  
24 highly blushed colouring pattern are mainly caused by the accumulation of  
25 anthocyanins in the pericarp. Hormones are important factors modulating anthocyanin  
26 accumulation. However, a good understanding of the interplay between hormones and  
27 anthocyanin synthesis in apples, especially in mutants at the molecular level, remains  
28 elusive. Here, physiological and comparative transcriptome approaches were used to  
29 reveal the molecular basis of pericarp pigmentation in ‘Red Delicious’ and its mutants,  
30 including ‘Starking Red’, ‘Starkrimson’, ‘Campbell Redchief’ and ‘Vallee spur’,

31 which were designated G0 to G4, respectively. Pericarp pigmentation gradually  
32 proliferated from G0 to G4. The anthocyanin content was higher in the mutants than  
33 in 'Red Delicious'. The activation of early phenylpropanoid biosynthesis genes,  
34 including *ASP3*, *PAL*, *4CL*, *PER*, *CHS*, *CYP98A* and *F3'H*, was responsible for  
35 anthocyanin accumulation in mutants. In addition, IAA and ABA had a positive  
36 regulatory effect on the synthesis of anthocyanins, while GA had the reverse effect.  
37 The down-regulation of *AACT1*, *HMGS*, *HMGR*, *MVK*, *MVD2*, *IDII* and *FPPS2*  
38 involved in terpenoid biosynthesis influences anthocyanin accumulation by positively  
39 regulating transcripts of *AUX1* and *SAUR* that contribute to the synthesis of IAA,  
40 *GID2* to GA, *PP2C* and *SnRK2* to ABA. Furthermore, MYB and bHLH members,  
41 which are highly correlated ( $r=0.882-0.980$ ) with anthocyanin content, modulated  
42 anthocyanin accumulation by regulating the transcription of structural genes,  
43 including *CHS* and *F3'H*, involved in the flavonoid biosynthesis pathway.

44

## 45 INTRODUCTION

46 Bud sport is a somatic mutation occurring in the shoot cells of perennial fruit trees  
47 and an important source of discovery of new cultivars or strains that are superior to  
48 the parent (Petit and Hampe 2006; El-Sharkawy *et al.* 2015). Although the genetic  
49 background of these mutants is nearly identical to that of their parents (Nwafor *et al.*  
50 2014; Otto *et al.* 2014), epigenetic changes have been recognized, such as causing  
51 fruit colour alteration in apple (*Malus domestica* Brokh.) (Xu *et al.* 2012;  
52 El-Sharkawy *et al.* 2015). Pericarp colour is a key appearance and nutrition quality  
53 attribute of apple fruit (Willams and Benkeblia 2018). Anthocyanins are secondary  
54 metabolites that contribute to the colours of fruits (Meng *et al.* 2016). Pigmentation in  
55 the skin of apple fruit varies among cultivars and is influenced by environmental  
56 factors, including temperature (Arrizabalaga *et al.* 2018) and the level of sunlight  
57 irradiation (Cominelli *et al.* 2007; Honda and Moriya 2018). Furthermore, hormones  
58 are likely to be important factors that modulate light-dependent anthocyanin  
59 accumulation (Jeong *et al.* 2004; Carvalho *et al.* 2010; Loreti *et al.* 2010). In summary,  
60 exploring the molecular mechanisms of hormones and anthocyanin synthesis in apple

61 fruit and its bud sport mutants is crucial to research on pigment accumulation and  
62 plant somatic mutation.

63 Previous studies have shown that auxin (IAA), cytokinin (CTK), gibberellins (GA),  
64 jasmonate acid (JA), abscisic acid (ABA) and ethylene (ETH) interact in controlling  
65 anthocyanin biosynthesis (El-Kereamy *et al.* 2003; Jeong *et al.* 2004; Loreti *et al.*  
66 2010; Liu *et al.* 2014; Ji *et al.* 2014). In addition, the identification and functional  
67 characterization of MYB and bHLH transcriptional factors revealed that they play a  
68 role in autonomously mediated structural gene transcription. These factors include  
69 chalcone isomerase (*CHI*), chalcone synthase (*CHS*), flavonol synthase (*FLS*),  
70 leucoanthocyanidin reductase (*LAR*), flavonoid 3'-hydroxylase (*F3'H*) and  
71 anthocyanidin reductase (*ANR*), which are involved in the anthocyanin biosynthesis  
72 pathway (Deluc *et al.* 2008; Gonzalez *et al.* 2008; Talias *et al.* 2011; Petroni and  
73 Tonelli 2011; An *et al.* 2012). MYB proteins are characterized by two imperfect  
74 repeats of the DNA-binding motifs R2 and R3 (Ramsay and Glover 2005), and bHLH  
75 proteins are characterized by the basic helix-loop-helix domain, which is responsible  
76 for sequence-specific DNA binding (Massari and Murre 2000).

77 The publication of the apple reference genome (Daccord *et al.* 2017) and the  
78 development of new tools for transcriptomics have facilitated recent advances in the  
79 genome-wide analysis of dynamic gene expression during pericarp development  
80 (El-Sharkawy *et al.* 2015; Massonnet *et al.* 2017). The strategies of hormone and  
81 anthocyanin synthesis are often applied without a full understanding of the effect at  
82 the molecular level, with the exception of a few studies that have correlated  
83 biochemical and physiological outcomes with transcriptomic changes (Jeong *et al.*  
84 2004; Carvalho *et al.* 2010; Loreti *et al.* 2010). Apple cultivar 'Red Delicious' (*M.*  
85 *domestica*) is the most frequently captured sport apple variety that is usually selected  
86 on the phenotypic basis of spur type and intense red fruit colour. The cultivar's four  
87 continuous generation mutants, namely, 'Starking Red', 'Starking Red', 'Starkrimson',  
88 'Campbell Redchief' and 'Vallee Spur', have been screened. Therefore, these five  
89 strains were selected and analysed using a comparative transcriptome combined with  
90 physiological and biochemical characteristics to expound the relationships between

91 hormone and anthocyanin synthesis on apple pericarp pigment accumulation.

92

## 93 **MATERIALS AND METHODS**

### 94 **Plant material**

95 ‘Red Delicious’ is the most frequently captured sport apple variety, featuring four  
96 continuous generation mutants. ‘Starking Red’ is a bud sport from ‘Red Delicious’  
97 and a typical representative of the first generation. The second generation is  
98 ‘Starkrimson’, which is a bud sport from the first-generation ‘Starking Red’. The  
99 fourth generation, ‘Vallee Spur’, is a bud sport of the third generation, ‘Campbell  
100 Redchief’, which is bud sport of ‘Starkrimson’. Mature apple fruit of these five  
101 cultivars range from having red vertical stripes to being completely red (see Figure  
102 1A).

103 Fruit pericarp samples of ‘Red Delicious’ and its four continuous generation  
104 mutants (‘Starking Red’, ‘Starkrimson’, ‘Campbell Redchief’ and ‘Vallee spur’) were  
105 named G0 to G4 and collected in 2017 from 12-year-old trees grown in apple  
106 demonstration gardens at Tianshui, China. Briefly, 20–30 fruits from each of the five  
107 strains were sampled at three developmental stages, i.e., 5 August (S1), 25 August  
108 (S2), and 14 September (S3) (see Figure 1A). Stages S1, S2 and S3 are equivalent to  
109 the pre-veraison, veraison and fruit maturity stages for commercial harvest,  
110 respectively. In different experiments, pericarp samples from 6 fruits per replicate  
111 with three independent biological replicates were collected. All samples were  
112 collected at the same time of day (9–10 AM), immediately frozen in liquid nitrogen and  
113 stored at –80 °C for further analysis of anthocyanin contents, endogenous hormone  
114 contents and gene expression profiles (qRT-PCR). In addition, samples from S2 were  
115 used for RNA-seq analysis.

116

### 117 **Anthocyanin quantification**

118 Lyophilized apple pericarp samples were finely ground, and approximately 500 mg of

119 powdered samples was homogenized in 10 mL of methanol with 1% HCl. The  
120 homogenate was transferred to a calibration test tube with a constant volume of 20  
121 mL and kept for 20 min at 4 °C with shaking under dark conditions. Then, the  
122 samples were filtered through a 0.2 µm polyethersulfone (PES) filter (Krackeler  
123 Scientific, Inc., Albany, NY, USA) and analysed using a TU-1900 double beam  
124 UV-visible spectrophotometer (Beijing Purkinje General Instrument Co. LTD).  
125 Anthocyanin levels were calculated by dividing the absorbance by the coefficient of  
126 regression (0.0214) acquired by standard scale measurements.

127

### 128 **Hormone content measurement**

129 A total of 1.0 g of each lyophilized apple pericarp sample was ground quickly after  
130 liquid nitrogen was added and combined with 10 mL of 80% chromatographic pure  
131 methanol. Each sample was washed three times with solvent, transferred into a test  
132 tube, and stored in a refrigerator at 4 °C overnight in the dark. Then, the samples were  
133 centrifuged for 20 min under refrigerated conditions at 4 °C. Supernatant fluid was  
134 transferred into a new centrifuge tube. The extract was concentrated, and the methanol  
135 was volatilized at 40 °C by rotary evaporation to obtain 2 mL of concentrate. The  
136 evaporation bottle wall was then washed continuously with 50% methanol, and the  
137 volume was raised to 10 mL with 50% chromatographic pure methanol. The fluid for  
138 testing was filtered through a 0.22 µm organic membrane.

139 The determination method was performed with different concentrations of IAA,  
140 GA, and ABA, standard samples, which were used to construct a standard curve. The  
141 standard samples were purchased from Sigma Company, and the external standard  
142 curve and quantitative methods were performed for the measurements. The apparatus  
143 used for high-performance liquid chromatography (HPLC) was the LC-20AD system  
144 (Shimadzu, Kyoto, Japan) equipped with a Zorbax Eclipse Plus C18 column (4.6 mm  
145 × 250 mm × 5.0 µm, Agilent, Palo Alto, CA, USA) and an SPD-20A UV detector. The  
146 mobile phase was chromatographic methanol and 0.6% iced acetic acid. The flow  
147 velocity was 1.0 mL/min, the wavelength was 254 nm, and the column temperature

148 was 25 °C.

149

### 150 **RNA extraction**

151 Total RNA was extracted from approximately 200 mg of lyophilized apple pericarp  
152 samples ground in liquid nitrogen using the RNase-Free DNase Set (Qiagen, Valencia,  
153 CA, USA) and then cleaned with the RNeasy Mini Kit (Qiagen). RNA quality and  
154 quantity were determined using a Pultton P200 Micro Volume Spectrophotometer  
155 (Pultton Technology Limited).

156

### 157 **Library preparation and sequencing**

158 The 5 triplicate samples (5 varieties at S2) yielded 15 nondirectional cDNA libraries  
159 with a total of 68.18 million reads (Table 1), which were prepared from 3.0 µg of total  
160 RNA using the NEBNext, Ultra™ RNA Library Prep Kit (NEB, USA). RNA quality  
161 and quantity were assessed using a NanoDrop spectrophotometer and an Agilent 2100  
162 spectrophotometer (Agilent Technologies, CA, USA). Library fragments were  
163 purified with an AMPure XP system (Beckman Coulter, Beverly, USA), and the  
164 quality was assessed on an Agilent Bioanalyzer 2100 system. Index-coded samples  
165 were clustered on a cBot cluster generation system using the TruSeq PE Cluster Kit  
166 v3-cBot-HS (Illumina Inc., San Deigo). After cluster generation, library preparations  
167 were sequenced on an Illumina HiSeq 2000 platform, in which 125 bp paired-end  
168 reads were generated.

169

### 170 **Analysis of sequencing results: mapping and differential expression**

171 Raw reads were cleaned by removing adapter sequences, reads containing ploy-N,  
172 and low-quality sequences ( $Q < 20$ ). Clean reads were aligned onto the apple  
173 reference genome (<https://iris.angers.inra.fr/gddh13/>) (Daccord *et al.* 2017). New  
174 transcripts were identified from TopHat alignment results using the Cufflinks v2.1.1  
175 reference-based transcript assembly method. An average of 83.95% of reads were  
176 mapped for each sample (Table 1). For annotations, all novel genes were searched

177 against the NCBI non-redundant protein sequence database (Nr), Swiss-Prot, Gene  
178 Ontology (GO) database, Cluster of Orthologous Groups of proteins (COG), protein  
179 family (Pfam), and Kyoto Encyclopedia of Genes and Genomes (KEGG) database  
180 using BLASTx with  $10^{-5}$  as the E-value cut-off point; sequences with the highest  
181 similarities were retrieved. After amino acid sequences of new genes were predicted,  
182 they were searched against the Pfam database using HMMER software, and  
183 annotation information of these new genes was obtained.

184 The DESeq (2010) R package was utilized to detect differentially expressed genes  
185 (DEGs). The false discovery rate (FDR) was used to identify the  $P$ -value threshold in  
186 multiple tests (Benjamini and Hochberg, 1995). An  $FDR < 0.01$  and fold changes  $\geq 2$   
187 were used as screening criteria; an absolute value of  $\log_2$  (fold change) with reads per  
188 kb per million reads (FPKM)  $\geq 1.0$  was used as a threshold to determine significant  
189 DEGs (Mortazavi *et al.* 2008).

190

### 191 **Functional analysis of differentially expressed genes (DEGs)**

192 Functional enrichment analysis, including GO and KEGG, was performed to identify  
193 DEGs that were significantly enriched in GO terms or metabolic pathways. GO  
194 enrichment analysis of DEGs was implemented by the GOseq R package, in which  
195 gene length bias was corrected. GO coupled with  $KS < 0.01$  was considered  
196 significantly enriched by DEGs (see Table S1). KOBAS software was used to test the  
197 statistical enrichment of different expression genes in KEGG pathways. Pathways  
198 with a  $Q$ -value  $\leq 0.05$  were defined as genes that displayed significant levels of  
199 differential expression (see Table S2).

200

### 201 **Common expression pattern clustering analysis of DEGs**

202 The different expression patterns of DEGs among the five strains were analysed using  
203 the R language, Cluster package, Biobase package, and  $Q$ -value package. The DEGs  
204 with a common expression trend were divided into a data set, which was expressed as  
205 a model map. The distance measure used was Euclidean distance, and the clustering

206 method was K-means clustering or hierarchical clustering.

207

### 208 **Correlation analysis**

209 A correlation matrix was prepared using SPSS statistical software and Pearson's  
210 correlation coefficient as the statistical metric. The analysis was performed using the  
211 anthocyanin content at S2 and the FPKM average of each candidate DEG. Correlation  
212 values were converted to distance coefficients to define the height scale of the  
213 dendrogram.

214

### 215 **Quantitative real-time PCR validation of RNA-Seq data**

216 Quantitative reverse transcription RT-PCR analysis DNase-treated RNA (2 µg) was  
217 reverse transcribed in a reaction volume of 20 µl using PrimerScript™ RT reagent Kit  
218 with gDNA Eraser (Takara, Dalian, China). Gene-specific primers were designed  
219 using Primer Express software (Applied Biosystems) (see Table S3). Quantitative  
220 reverse transcription PCR (qRT-PCR) assays were performed using 20 ng of cDNA  
221 and 300 nM of each primer in a 10 µl reaction with SYBR Green PCR Master Mix  
222 (Takara, Dalian, China). Three biological and three technical replicates for each  
223 reaction were analysed on a LightCycler® 96 SW 1.1 instrument (Roche). The  
224 amplification program consisted of one cycle of 95 °C for 30 s, 40 cycles of 95 °C for  
225 5 s, and melting analysis at 60 °C for 34 s, followed by one cycle of 95 °C for 15 s,  
226 60 °C for 60 s, and 95 °C for 15 s. Transcript abundance was quantified using  
227 standard curves for both target and reference genes, which were generated from serial  
228 dilutions of PCR products from corresponding cDNAs. Transcript abundance was  
229 normalized to the reference gene *MdGADPH*, which showed high stability across the  
230 different apple genotypes and tissues used in this study. Relative gene expression was  
231 normalized by comparing with G0 expression and analysed using the comparative  
232  $2^{-\Delta\Delta C_T}$  method (Livak and Schmittgen 2001).

233

### 234 **Data analysis**



235 Data regarding the anthocyanin content and the relative expression level of specific  
236 genes were analysed by ANOVA, and treatment means were separated by Duncan's  
237 multiple range test at  $P < 0.05$  with the aid of SPSS statistical software. For  
238 correlation analysis, the Pearson correlation coefficient ( $r$ ) was calculated, and a  
239 two-tailed test was carried out.

240

#### 241 **Data availability**

242 Supplemental materials available at FigShare. Dataset 1 contains the mean of the  
243 normalized expression value per transcript (FPKM fragments per kilobase of mapped  
244 reads) of the 5-sample at S2. Dataset 2 contains DEGs identified as commonly  
245 up-regulated or down-regulated in each pairwise comparison of 'Red Delicious' and  
246 its four generation mutants. Dataset 3 contains gene composition of the six clusters  
247 identified using gene expression clustering analysis. Dataset 4 contains gene  
248 composition and mean FPKM value of the phenylpropanoid/flavonoid biosynthesis  
249 pathway. Dataset 5 contains correlation analysis of anthocyanin content at S2 and  
250 MYB transcriptional factors. Dataset 6 contains correlation analysis of anthocyanin  
251 content at S2 and bHLH transcriptional factors. Dataset 7 contains gene composition  
252 and mean FPKM value of the terpenoid biosynthesis pathway. Dataset 8 contains gene  
253 composition and mean FPKM value of the plant hormone signal transduction.

254

## 255 **RESULTS**

### 256 **Pericarp pigmentation increased with bud sport generation and maturation**

257 Visual inspection of apple pericarp colour during development revealed that the G2,  
258 G3 and G4 strains began colouring at S1, with the most visibly intense red colouring  
259 occurring in G3 and G4 (see Figure 1A). Pigmentation of these five strains  
260 progressively advanced to much higher levels from S1 to the subsequent stage S3,  
261 resulting in red fruit at maturity. In addition, red coloration gradually proliferated  
262 from G0 to G4 during the three stages.

263 Consistent with visual inspection, the analysis of apple pericarp anthocyanin

264 contents showed that the levels of total anthocyanins in the five strains were initially  
265 low and sharply increased with maturation (from S1 to S3) (see Figure 1B). Relative  
266 to that at G0, the total anthocyanin level in fruit skin was ~0.78-, ~1.20-, ~5.02- and  
267 ~2.85-fold higher in G1, G2, G3 and G4 at stage S1, respectively. At S2, the level in  
268 fruit skin was ~1.41-, ~4.65-, ~6.33- and ~4.72-fold higher in G1, G2, G3 and G4,  
269 respectively. Finally, at S3, the level in fruit skin was ~2.14-, ~3.41-, ~5.25- and  
270 ~4.35-fold higher in G1, G2, G3 and G4, respectively. Briefly, anthocyanin content  
271 was lowest in G0 and highest in G3, followed by the contents in G4, G2, and G1. It  
272 was concluded that the more intense red colouring pattern in the apple pericarp of bud  
273 sport mutants was mainly caused by the accumulation of anthocyanins. In addition, a  
274 more blushed colouring pattern was observed with an increase in the number of bud  
275 sport generations. However, the third-generation mutant G3 showed greater blushing  
276 than did the fourth-generation mutant G4 at S1 and S2, and there was no significant  
277 difference at S3.

278

### 279 **The contents of IAA and ABA in apple pericarp increased with bud sport** 280 **generation at veraison, while the content of GA decreased**

281 Hormone levels were also analysed at three time points (S1, S2, and S3). The overall  
282 trend of IAA concentrations in apple pericarp first increased and then decreased from  
283 S1 to S3 and peaked at S2 (see Figure 1C). However, the GA content decreased from  
284 S1 to S3 (see Figure 1D). ABA concentrations of G0, G1 and G2 peaked at S1,  
285 whereas those of G3 and G4 peaked at S2 (see Figure 1E). Importantly, the IAA and  
286 ABA contents of G3 and G4 in apple pericarp at veraison S2 were considerably  
287 higher than those of G2, while G0 and G1 showed considerably lower levels than did  
288 G2. Nevertheless, GA concentrations, which displayed a trend opposite that of IAA  
289 and ABA, decreased with bud sport generation, that is, from G0 to G4.

290

### 291 **Transcriptomic profiling of the pericarp of ‘Red Delicious’ and its four** 292 **continuous generation mutants**

293 Triplicate sampling of the pericarp of ‘Red Delicious’ and its four continuous

294 generation mutants at S2 yielded 15 RNA samples for RNA sequencing (RNA-seq)  
295 analysis, and the mapping rate of 20,189,457-26,765,510 clean reads onto the apple  
296 reference genome (<https://iris.angers.inra.fr/gddh13/>) (Daccord *et al.* 2017) ranged  
297 from 83.29% to 84.81% (Table 1). The average number of mapped reads ranged from  
298 34,093,629 in G2 to 43,153,440.33 in G3. An FDR < 0.01 and fold changes  $\geq 2$  were  
299 used as screening criteria for DEGs; in addition, an FPKM (fragments per kilobase of  
300 mapped reads)  $\geq 1.0$  in at least one of the 5 triplicate samples was considered to be  
301 expressed. The mean normalized expression value (FPKM) per transcript of the three  
302 biological replicates was calculated for each sample using the geometric  
303 normalization method. The resulting dataset comprising 33,192 transcripts was used  
304 for subsequent analysis (see Dataset S1).

305

### 306 **Differentially expressed genes (DEGs) in ‘Red Delicious’ versus its mutants** 307 **gradually increased with bud sport generation at veraison**

308 To identify DEGs in ‘Red Delicious’ and its four generation mutants, seven pairwise  
309 transcriptome comparisons (i.e., G0 versus G1, G0 versus G2, G0 versus G3, G0  
310 versus G4, G1 versus G2, G2 versus G3, and G3 versus G4) were performed at S2  
311 (see Figure 2, Figure S1 and Table S1). The total number of DEGs was 3,466,  
312 including 1,456 up-regulated DEGs and 2029 down-regulated DEGs (see Figure 2 and  
313 Dataset S2). Among them, the number of both up-regulated and down-regulated  
314 DEGs increased considerably from the first generation mutant G1 to the fourth  
315 generation mutant G4 versus the number observed in G0, and the smallest number  
316 was observed in G1 versus that in G2. Moreover, we found that more genes were  
317 down-regulated than up-regulated in G1, G2, G3 and G4 relative to G0.

318

### 319 **Comparative transcriptome enrichment analysis identified key processes** 320 **responsible for anthocyanin accumulation in ‘Red Delicious’ and its mutants**

321 To understand the major functional categories represented by the DEGs, gene  
322 ontology (GO) enrichment analysis was carried out using all reference genes as  
323 background via the Goseq R package. GO term enrichment analysis categorized the

324 annotated sequences into three main categories: biological process, cellular  
325 component and molecular function (see Table S2). In the biological process category,  
326 three significantly enriched terms, namely, “defence response to fungus”,  
327 “1-aminocyclopropane-1-carboxylate biosynthetic process” and “negative regulation  
328 of growth”, were shared in G0 versus G1, G0 versus G2, G0 versus G3 and G0 versus  
329 G4; among these terms, “1-aminocyclopropane-1-carboxylate biosynthetic process”  
330 and “negative regulation of growth” were also enriched in G1 versus G2, G2 versus  
331 G3 and G3 versus G4. Furthermore, in addition these two GO terms, three other  
332 significantly enriched GO terms, namely, “chitin catabolic process”, “regulation of  
333 leaf development” and “DNA conformation change”, were shared in G0 versus G1,  
334 G1 versus G2, G2 versus G3 and G3 versus G4. The cellular component category was  
335 further classified into “elongator holoenzyme complex”, which was enriched in G0  
336 versus G1, G0 versus G2, G0 versus G3 and G0 versus G4, whereas, “elongator  
337 holoenzyme complex”, “mitochondrial intermembrane space” and “U12-type  
338 spliceosomal complex” were shared in G0 versus G1, G1 versus G2, G2 versus G3  
339 and G3 versus G4. In the molecular function category, the DEGs were further  
340 classified into nine terms in the seven abovementioned comparison groups: “ADP  
341 binding”, “L-iditol 2-dehydrogenase activity”, “acyl-CoA hydrolase activity”,  
342 “3-beta-hydroxy-delta5-steroid dehydrogenase activity”, “O-methyltransferase  
343 activity”, “1-aminocyclopropane-1-carboxylate synthase activity”,  
344 “naringenin-chalcone synthase activity”, “catechol oxidase activity” and  
345 “trans-cinnamate 4-monooxygenase activity”. Moreover, “chitinase activity”, “sulfur  
346 compound binding” and “caffeate O-methyltransferase activity” were only observed  
347 in G0 versus G1, G1 versus G2, G2 versus G3 and G3 versus G4.

348 To further systematically understand the molecular interactions among the DEGs,  
349 we performed KEGG analysis using KOBAS software. The significantly enriched  
350 KEGG pathway term “sesquiterpenoid and triterpenoid biosynthesis” was shared in  
351 G0 versus G1, G0 versus G2 and G0 versus G3, but not in G0 versus G4 (Table 2).  
352 However, the “sesquiterpenoid and triterpenoid biosynthesis” pathway was derived  
353 from “terpenoid backbone biosynthesis”, which occurred both in G0 versus G3 and

354 G0 versus G4. Furthermore, the number of DEGs belonging to the triterpenoid  
355 biosynthesis pathway gradually increased from G0 versus G1 to G0 versus G4. In  
356 addition, the “flavonoid biosynthesis” pathway was enriched in G0 versus G2, G0  
357 versus G3 and G0 versus G4. Moreover, the “plant hormone signal transduction”  
358 pathway was enriched in G0 versus G1, G0 versus G2, G0 versus G3, G0 versus G4,  
359 G2 versus G3 and G3 versus G4 but not in G1 versus G2. Thus, the four  
360 abovementioned candidate pathways were considered to be heavily involved in  
361 anthocyanin accumulation.

362

### 363 **Functional classification of DEGs in ‘Red Delicious’ and its four continuous** 364 **generation mutants**

365 To further identify the major functions of DEGs and establish the pericarp pigment  
366 transcriptome, clustering analysis was applied to the 3,466 DEGs. These genes were  
367 grouped into six expression patterns (see Figure 3 and Dataset S3). Cluster 1  
368 contained 561 DEGs whose expression peaked at G0/G1/G2. Cluster 2 contained 336  
369 DEGs whose expression peaked at G3/G4. Cluster 3 contained 363 DEGs whose  
370 expression peaked at G2. Furthermore, 1049 and 348 DEGs whose expression peaked  
371 at G0 were included in clusters 4 and 5, respectively. Cluster 6 contained 809 DEGs  
372 whose expression peaked at G4. KEGG analysis was also carried out for DEGs  
373 belonging to each pattern with a  $P$ -value  $\leq 0.01$ . The expression pattern of cluster 2  
374 was positively consistent with total anthocyanin content (see Figure 1B), whereas  
375 clusters 4 and 5 were negatively aligned. DEGs in cluster 2 were significantly  
376 enriched in “plant hormone signal transduction”, “flavonoid biosynthesis”, “flavone  
377 and flavonol biosynthesis”, “phenylalanine metabolism”, and “phenylpropanoid  
378 biosynthesis”. Among those, some of the final metabolites of “flavonoid biosynthesis”,  
379 “flavone and flavonol biosynthesis”, “phenylalanine metabolism”, and  
380 “phenylpropanoid biosynthesis” are anthocyanins (Massonnet *et al.* 2017).  
381 Remarkably, the pathway that was co-enriched by clusters 4 and 5 was  
382 “sesquiterpenoid and triterpenoid biosynthesis”, which was hypothesized to be  
383 negatively related to the accumulation of anthocyanins. In addition, the pathway of

384 “terpenoid backbone biosynthesis” was also enriched in cluster 1, and “flavonoid  
385 biosynthesis” and “phenylalanine metabolism” were enriched in cluster 3. Overall, the  
386 results of the functional classification analysis of the common expression patterns of  
387 DEGs combined with KEGG agreed with the results of the aforementioned  
388 comparative transcriptome enrichment analysis. Therefore, pathways including  
389 “flavonoid/phenylpropanoid biosynthesis”, “terpenoid biosynthesis” and “plant  
390 hormone signal transduction” were selected for subsequent analysis.

391

### 392 **Key candidate DEGs responsible for anthocyanin accumulation in ‘Red 393 Delicious’ and its mutants**

#### 394 *Genes involved in phenylpropanoid/flavonoid biosynthesis pathway*

395 Variety-specific trends in the expression of phenylpropanoid/flavonoid biosynthesis  
396 pathway genes at S2 were investigated by preparing heat maps (see Figure 4A). We  
397 focused on the 28 DEGs involved in this pathway, including 4 from cluster 1, 13 from  
398 cluster 2, 10 from cluster 3, and 1 from cluster 5 (Table 3). Differences in the  
399 expression pattern of these genes from cluster 2 were found among ‘Red Delicious’  
400 and its four continuous generation mutants, closely mirroring the differences in total  
401 anthocyanin concentration at S2. For example, all DEGs involved in the  
402 phenylpropanoid biosynthesis pathway, including one aspartate aminotransferase  
403 cytoplasmic (*ASP3*), one Phe ammonia lyase (*PAL*), two beta-glucosidase (*BGLU*),  
404 one 4-coumarate-CoA ligase (*4CL*) and three peroxidases (*PER*), were from cluster 2,  
405 demonstrating a gradually increasing expression pattern from G0 to G4 (see Figure  
406 4A and Dataset S4). Among the DEGs, *ASP3* participates in the synthesis of  
407 phenylalanine and phenylpyruvate, which are precursors of anthocyanin synthesis.  
408 *BGLU* and *PER* are involved in coumarine and lignin biosynthesis, respectively. *PAL*  
409 and *4CL* are phenylpropanoid genes. In addition, down-regulated genes, including  
410 two quinate hydroxycinnamoyl transferase (*HCT*) and one caffeoyl-CoA  
411 O-methyltransferase (*CCoAOMT*), and up-regulated genes, including three  
412 cytochrome P450 98A2-like (*CYP98A*), four *CHS*, one avanone-3-hydroxylase (*F3H*),  
413 one dihydroflavonol reductase (*DFR*), and one anthocyanidin synthase (*ANS*), are

414 involved in the synthesis of delphinidin from the phenylpropanoid biosynthesis  
415 pathway. Furthermore, the four *CHS* genes described above, one down-regulated and  
416 one up-regulated *CHI* gene, two *F3'H* genes, and the aforementioned *F3H*, *DFR* and  
417 *ANS* are involved in the synthesis of cyanidin. *F3'H* and other genes involved in  
418 pelargonidin synthesis are the same as those involved in cyanidin synthesis. These  
419 findings confirm that delphinidin, cyanidin and pelargonidin are the three main  
420 substances responsible for the synthesis of anthocyanins via the phenylpropanoid  
421 biosynthesis pathway in apple. Moreover, two down-regulated *FLS* genes are  
422 involved in flavone and flavonol biosynthesis.

423

#### 424 *Genes involved in myb-like and helix-loop-helix DNA-binding domain transcriptional* 425 *factors*

426 Correlative analysis was carried out between anthocyanin content at S2 and the  
427 expression levels of transcription factors that encode myb-like and helix-loop-helix  
428 DNA-binding domains in DEGs (see Dataset S5, 6). As a result, 13 MYB and 5  
429 bHLH transcription factors were screened. Among them, the expression of MYB  
430 members, including *LUX*, *MYB113*, *PCL-like*, *MYB1R1-like*, *MYB6-like*, *MYB308-like*  
431 and *MYB5-like*, bHLH members, including *bHLH51* and *bHLH155*, presented a  
432 notable positive correlation with anthocyanin content at S2 ( $P < 0.05$ ) (see Figure 4B,  
433 C). MYB members *LHY-like*, *RVE6*, *GT-3b*, *MYB21*, *DNAJC2-like* and *MYB4-like*  
434 and bHLH members *bHLH62*, *bHLH74* and *bHLH162* showed a remarkably negative  
435 correlation with anthocyanin content at veraison S2 ( $P < 0.05$ ).

436

#### 437 *Genes involved in terpenoid biosynthesis and plant hormone signal transduction*

438 KEGG analysis showed that terpenoid backbone biosynthesis was over-presented in  
439 cluster 1 and that sesquiterpenoid and triterpenoid biosynthesis branching from  
440 terpenoid backbone biosynthesis was over-presented in clusters 4 and 5 (see Figure 3),  
441 indicating that this pathway may play important roles in anthocyanin accumulation in  
442 apple. Moreover, the plant hormone signal transduction pathway, which is modulated  
443 by terpenoid biosynthesis, was enriched in cluster 2. A total of 18 DEGs in the

444 terpenoid biosynthesis pathway (see Dataset S7 and Table 4) and 12 DEGs in the  
445 plant hormone signal transduction pathway (see Dataset S8 and Table 5) were also  
446 investigated by preparing heat maps (see Figure 5). The expression of DEGs involved  
447 in terpenoid backbone biosynthesis, including one acetyl-CoA acetyltransferase,  
448 cytosolic 1 (*AACT1*), two hydroxymethylglutaryl-CoA synthase-like (*HMGS*), two  
449 3-hydroxy-3-methylglutaryl-coenzyme A reductase 1-like (*HMGR*), one mevalonate  
450 kinase-like (*MVK*), two diphosphomevalonate decarboxylase MVD2-like (*MVD2*),  
451 one isopentenyl-diphosphate Delta-isomerase I (*IDII*), three farnesyl pyrophosphate  
452 synthase 2-like (*FPPS2*) and six squalene monooxygenase-like (*SQMO*), were  
453 gradually down-regulated from G0 to G4. Nevertheless, two auxin transporter-like 1  
454 (*AUX1*), four auxin-responsive protein *AUX/IAA* and three auxin-responsive protein  
455 *SAUR* involved in tryptophan metabolism of auxin biosynthesis; one F-box protein  
456 *GID2*-like (*GID2*) involved in diterpenoid biosynthesis of GA biosynthesis; and one  
457 protein phosphatase 2C (*PP2C*) and one sucrose non-fermenting-1-related protein  
458 kinase 2 (*SnRK2*) involved in carotenoid biosynthesis of ABA biosynthesis were  
459 up-regulated from G0 to G4.

460 To further evaluate the validity of our results, 16 representative DEGs used  
461 previously as shown in Figures 4 and 5 were selected for expression level  
462 examination by qRT-PCR (see Table S3). The overall trend of relative expression  
463 levels at three stages was consistent with that of deep sequencing at S2 (see Figure 6),  
464 suggesting that the candidate genes involved in pathways such as  
465 phenylpropanoid/flavonoid biosynthesis, terpenoid biosynthesis and plant hormone  
466 signal transduction, appended with MYB and bHLH transcriptional factors, were  
467 directly correlated with anthocyanin accumulation.

468

## 469 **DISCUSSION**

### 470 **The activation of early phenylpropanoid biosynthesis genes was more responsible** 471 **for anthocyanin accumulation in apple pericarp of bud sport mutants**

472 In plants, phenylpropanoid biosynthesis gives rise to a large number of secondary  
473 metabolites, including hydroxycinnamic acids, monolignols/lignin, coumarins,



474 benzoic acids, stilbenes, anthocyanins and flavonoids, serving different functions in  
475 plant development, reproduction, defence, and protection against biotic/abiotic  
476 stresses (Voge 2010; Zhang *et al.* 2013). Differences in the expression pattern of  
477 genes involved in phenylpropanoid/flavonoid biosynthesis result in diverse  
478 anthocyanin profiles (El-Sharkawy *et al.* 2015; Massonnet *et al.* 2017). Our survey  
479 provided a comprehensive profile of the phenylpropanoid/flavonoid biosynthesis  
480 pathway in ‘Red Delicious’ and its four continuous generation mutants. The results  
481 showed that all of the early phenylpropanoid biosynthesis pathway genes, including  
482 *ASP3*, *PAL*, *4CL*, *BGLU* and *PER*, were aggregated in cluster 2 (see Figure 4A and  
483 Table 3), which matched the anthocyanin content (see Figure 1A, B). Other genes in  
484 cluster 2 containing *CHS*, *CYP98A* and *F3’H* are involved in the middle steps of the  
485 phenylpropanoid pathway, that is, the early steps of the flavonoid biosynthesis  
486 pathway. Nevertheless, genes encoding *HCT*, *CCoAOMT*, *CHS*, *CYP98A*, *CHI*, *F3H*,  
487 *DFR*, *FLS* and *ANS* were involved in the middle and late steps of the phenylpropanoid  
488 biosynthesis pathway and gathered in clusters 1 and 3. Thus, the activation of early  
489 phenylpropanoid biosynthesis pathway genes was demonstrated to be most  
490 responsible for pigment accumulation in the apple pericarp of bud sport mutants. In  
491 addition, *ASP3*, *BGLU* and *PER* were confirmed to be involved in the synthesis of  
492 phenylpyruvate, coumarine and lignin, respectively (see Figure 4A). Interestingly, 44  
493 stilbene synthase (*STS*) genes involved in stilbene biosynthesis were characterized to  
494 influence anthocyanin accumulation during grapevine (*Vitis vinifera*) maturation by  
495 Massonnet *et al.* (2017). Nevertheless, these genes do not exist among our 3,466  
496 DEGs, possibly because of their variety-specific nature (Zenoni *et al.* 2016).

497

498 **MYB and bHLH modulated anthocyanin accumulation in apple pericarp by**  
499 **regulating the transcription of genes involved in the phenylpropanoid/flavonoid**  
500 **pathway**

501 MYB and bHLH autonomously mediated the transcription of genes involved in the  
502 middle steps of the phenylpropanoid pathway, that is, the early steps of the flavonoid  
503 biosynthetic pathway (*CHS*, *CHI*, *F3H*, *F3’H* and *FLS*), which leads to the production

504 of colourless dihydroflavonol compounds (Baudry *et al.* 2004; Stracke *et al.* 2007;  
505 Petroni and Tonelli 2011; Hu *et al.* 2016; An *et al.* 2017). The heterologous  
506 expression of OjMYB1 in *Arabidopsis* could enhance anthocyanin content and  
507 up-regulate the expression levels of structural gene-related anthocyanin biosynthesis  
508 (Feng *et al.* 2017). The red radish (*Raphanus sativus* L.) bHLH transcription factor  
509 RsTT8 acts as a positive regulator of anthocyanin biosynthesis (Lim *et al.* 2017).  
510 Nevertheless, *AtMYB4*, *AmMYB308*, *FaMYB1*, *ZmMYB31*, *ZmMYB42*, *PhMYB4*,  
511 *VvMYBC2-L1* and *PtrMYB57* have been demonstrated to repress phenylpropanoid  
512 synthesis, likely via repression of synthesis genes (Tamagnone *et al.* 1998; Aharoni *et al.*  
513 *et al.* 2001; Colquhoun *et al.* 2011; Huang *et al.* 2014; Wan *et al.* 2017). We  
514 corroborated that MYB members, including *LUX*, *MYB113*, *PCL-like*, *MYB1R1-like*,  
515 *MYB6-like*, *MYB308-like* and *MYB5-like*, and bHLH members, including *bHLH51*  
516 and *bHLH155*, showed a notable positive correlation with anthocyanin content (see  
517 Dataset S5, 6 and Figure 4B, C) and were considered to promote anthocyanin  
518 synthesis by mediating the transcription of structural genes, *CHS* and *F3'H*, which are  
519 involved in the flavonoid pathway. Other MYB members, including *LHY-like*, *RVE6*,  
520 *GT-3b*, *MYB21*, *DNAJC2-like* and *MYB4-like*, and bHLH members, including  
521 *bHLH62*, *bHLH74* and *bHLH162* showed a remarkably negative correlation with  
522 anthocyanin content and were demonstrated to repress anthocyanin synthesis. In  
523 addition, HD-Zip I transcription factor MdHB1 was involved in the regulation of  
524 anthocyanin accumulation (Lü *et al.* 2014). When MdHB1 is silenced, *MdMYB10*,  
525 *MdbHLH3*, and *MdTTG1* are released to activate the expression of *MdDFR* and  
526 *MdUFGT* and anthocyanin biosynthesis, resulting in red flesh in apple cv. 'Granny  
527 Smith' (Jiang *et al.* 2017). The expression of *F3'5'H*, *DFR* and *ANS* is strongly  
528 inhibited by the increase in the expression of *MYBL1*, which is a novel R3 MYB  
529 transcription factor classified as an MYB transcriptional repressor (Gates *et al.* 2018).  
530 However, a full understanding of the mechanism by which structural genes involved  
531 in anthocyanin synthesis are specifically mediated by MYB and bHLH remains  
532 elusive clear and requires further investigation.

534 **Terpenoid biosynthesis modulated anthocyanin accumulation by positively**  
535 **regulating plant hormone signal transduction in apple pericarp of bud sport**  
536 **mutants**

537 Hormones are important factors inducing anthocyanin accumulation (Jiang and Fu  
538 2007; Shan 2009; Loreti *et al.* 2010). Carvalho *et al.* (2010) provided evidence that  
539 anthocyanin accumulation was promoted by exogenous ABA and CTK and inhibited  
540 by GA in tomato hypocotyls. Co-treatment of IAA and CTK significantly enhanced  
541 the cytokinin-induced increase in anthocyanin levels, but an auxin concentration that  
542 was too high strongly inhibited anthocyanin synthesis even in the presence of  
543 cytokinin in callus cultures of red-fleshed apple (*M. sieversii f.niedzwetzkyana*), as  
544 shown by Ji *et al.* (2014). Our results showed that sesquiterpenoid and triterpenoid  
545 biosynthesis along with plant hormone transduction, including tryptophan metabolism  
546 for IAA, diterpenoid biosynthesis for GA and carotenoid biosynthesis for ABA,  
547 branches from the general terpenoid backbone synthesis pathway and shares the same  
548 precursors as glycolysis (see Figure 5). The sesquiterpenoid and triterpenoid  
549 biosynthesis pathways comprised six *SQMO* genes in clusters 4 and 5, which were  
550 negatively correlated with anthocyanin content. The genes *AACT1*, *HMGS*, *HMGR*,  
551 *MVK*, *MVD2*, *IDII* and *FPFS2*, involved in the early steps of terpenoid backbone  
552 synthesis, were in cluster 1, which also reflected the differential accumulation of  
553 anthocyanin to some extent. Moreover, *AUX1*, *AUX/IAA* and *SAUR*, associated with  
554 tryptophan metabolism for IAA; *GID2*, associated with diterpenoid biosynthesis for  
555 GA; and *PP2C* and *SnRK2*, associated with carotenoid biosynthesis for ABA, were in  
556 cluster 2, which positively reflected the anthocyanin content. Likewise, the contents  
557 of IAA and ABA increased, while GA decreased with maturation and pigment  
558 accumulation from G0 to the fourth-generation mutant G4 (see Figure 1C, E).  
559 Therefore, the down-regulation of genes involved in terpenoid biosynthesis positively  
560 induced the expression of *AUX1*, *AUX/IAA*, *SAUR*, *GID2*, *PP2C* and *SnRK2*, resulting  
561 in increased synthesis of IAA and ABA and decreased synthesis of GA, thus  
562 modulating anthocyanin accumulation. Loreti *et al.* (2010) suggested the existence of  
563 crosstalk between the sucrose and hormone signalling pathways in the regulation of

564 the anthocyanin biosynthetic pathway. Similarly, exogenous ABA promoted fruit  
565 ripening by increasing anthocyanin content in sweet cherry (*Prunus avium* L.) cv.  
566 Sato Nishiki, and the expression of *PaPP2C3*, *PaPP2C5* and *PaPP2C6* was  
567 significantly induced by exogenous ABA (Wang *et al.* 2015). In general, there may be  
568 some form of crosstalk between the activation of phenylpropanoid biosynthesis and  
569 plant hormone signal transduction in pigment accumulation of apple bud sport  
570 mutants.

571

## 572 CONCLUSIONS

573 We investigated the pericarp transcriptome of ‘Red Delicious’ and its four continuous  
574 generation mutants (‘Starking Red’, ‘Starkrimson’, ‘Campbell Redchief’ and ‘Vallee  
575 spur’) and identified specific processes that lead to the accumulation of anthocyanin.  
576 The results indicate that apple pericarp pigmentation and anthocyanin content were  
577 increased in the mutants due to bud sport. Terpenoid biosynthesis influences  
578 anthocyanin accumulation by positively regulating the synthesis of IAA and ABA and  
579 negatively regulating the synthesis of GA. MYB and bHLH modulate anthocyanin  
580 accumulation in apple pericarp by regulating the transcription of genes *CHS* and *F3’H*.  
581 *ASP3*, *CYP98A* and *CCoAOMT* are novel anthocyanin-associated genes of apple first  
582 reported the present study. This novel set of genes provides not only new insights into  
583 anthocyanin biosynthesis but also important clues for more dedicated studies to  
584 broaden our knowledge of the anthocyanin pathway in apple.

585

## 586 ACKNOWLEDGMENTS

587 This research was financially supported by the Key Scientific Technology Research  
588 Projects of Gansu Province (GPCK2013-2), the Fostering Foundation for the  
589 Excellent Ph.D. Dissertation of Gansu Agricultural University (2017002), and the  
590 Science and Technology Major Project of Gansu Province (18ZD2NA006).

591 Author contributions: Bai-Hong Chen designed the research. Wen-Fang Li carried out  
592 the experiments with the help of Juan Mao, Shi-Jin Yang, Zhi-Gang Guo, Zong-Huan  
593 Ma, Cun-Wu Zuo and Ming-Yu Chu. Wen-Fang Li collected the experimental data

594 and drafted the manuscript. Mohammed Mujitaba Dawuda reviewed the manuscript  
595 and part of the data analysis. All authors read and approved the final manuscript.

596

## 597 LITERATURECITED

598 Aharoni, A., C. H. R. D. Vos, M. Wein, Z. Sun, R. Greco *et al.*, 2001 The  
599 strawberry *FaMYB1* transcription factor suppresses anthocyanin and flavonol  
600 accumulation in transgenic tobacco. *Plant J.* 28: 319–332.

601 An, J. P., X. Liu, H. H. Li, C. X. You, and X. F. Wang, 2017 Apple RING E3 ligase  
602 MdMIEL1 inhibits anthocyanin accumulation by ubiquitinating and degrading  
603 MdMYB1 protein. *Plant Cell Physiol.* 58(11): 1953–1962.

604 An, X. H., Y. Tian, K. Q. Chen, X. F. Wang, and Y. J. Hao, 2012 The apple WD40  
605 protein MdTTG1 interacts with bHLH but not MYB proteins to regulate  
606 anthocyanin accumulation. *J. Plant Physiol.* 169: 710–717.

607 Arrizabalaga, M., F. Morales, M. Oyarzun, S. Delrot, E. Gomès *et al.*, 2018  
608 Tempranillo clones differ in the response of berry sugar and anthocyanin  
609 accumulation to elevated temperature. *Plant Sci.* 267: 74.

610 Baudry, A., M. A. Heim, B. Dubreucq, M. Caboche, B. Weisshaar, and L. Lepiniec,  
611 2004 TT2, TT8, and TTG1 synergistically specify the expression of BANYULS  
612 and proanthocyanidin biosynthesis in *Arabidopsis thaliana*. *Plant J.* 39: 366–380.

613 Benjamini, Y. and Y. Hochberg, 1995 Controlling the false discovery rate: a  
614 practical and powerful approach to multiple testing. *J. R. Statist. Soc. B.* 57:  
615 289–300.

616 Carvalho, R. F., Q. Vera, and P. Lep, 2010 Hormonal modulation of  
617 photomorphogenesis-controlled anthocyanin accumulation in tomato (*Solanum*  
618 *lycopersicum* L. cv Micro-Tom) hypocotyls: physiological and genetic studies.  
619 *Plant Sci.* 178(3): 258–264.

620 Colquhoun, T. A., J. Y. Kim, A. E. Wedde, L. A. Levin, K. C. Schmitt *et al.*, 2011  
621 *PhMYB4* fine-tunes the floral volatile signature of *Petunia* × *hybrida* through  
622 *PhC4H*. *J. Exp. Bot.* 62: 1133–1143.

623 Daccord, N., J. M. Celton, G. Linsmith, C. Becker, N. Choisne *et al.*, 2017

- 624 High-quality *de novo* assembly of the apple genome and methylome dynamics of  
625 early fruit development. *Nat. Genet.* 49(7): 1099.
- 626 Deluc, L., J. Bogs, A. R. Walker, T. Ferrier, A. Decendit *et al.*, 2008 The  
627 transcription factor VvMYB5b contributes to the regulation of anthocyanin and  
628 proanthocyanidin biosynthesis in developing grape berries. *Plant Physiol.* 147:  
629 2041–2053.
- 630 El-Kereamy, A., C. Chervin, J. P. Roustan, V. Cheyhner, J. M. Souquet *et al.*, 2003  
631 Exogenous ethylene stimulates the long term expression of genes related to  
632 anthocyanin biosynthesis in grape berries. *Physiol. Plantarum* 119: 175–282.
- 633 El-sharkawy, I., L. Dong, and K. Xu, 2015 Transcriptome analysis of an apple  
634 (*Malus × domestica*) yellow fruit somatic mutation identifies a gene network  
635 module highly associated with anthocyanin and epigenetic regulation. *J. Exp. Bot.*  
636 66(22): 7359–7376.
- 637 Gomi, K., A. Sasaki, H. Itoh, M. Ueguchi-Tanaka, M. Ashikari *et al.*, 2004 GID2,  
638 an F-box subunit of the SCF E3 complex, specifically interacts with phosphorylated  
639 SLR1 protein and regulates the gibberellin-dependent degradation of SLR1 in rice.  
640 *Plant J.* 37(4): 626–634.
- 641 Gonzalez, A., M. Zhao, J. M. Leavitt, and A.M. Lloyd, 2008 Regulation of the  
642 anthocyanin biosynthetic pathway by the TTG1/bHLH/Myb transcriptional  
643 complex in *Arabidopsis* seedlings. *Plant J.* 53: 814–827.
- 644 Honda, C. and S. Moriya, 2018 Anthocyanin biosynthesis in apple fruit. *Horticult. J.*
- 645 Hu, D. G., C. H. Sun, Q.J. Ma, C. X. You, L. Cheng *et al.*, 2016 MdMYB1  
646 regulates anthocyanin and malate accumulation by directly facilitating their  
647 transport into vacuoles in apples. *Plant Physiol.* 170(3): 1315–1330.
- 648 Huang, Y. F., S. Vialet, J. L. Guiraud, L. Torregrosa, Y. Bertrand *et al.*, 2014 A  
649 negative MYB regulator of proanthocyanidin accumulation, identified through  
650 expression quantitative locus mapping in the grape berry. *New Phytol.* 201(3):  
651 795–809.
- 652 Ito, S., D. Yamagami, M. Umehara, A. Hanada, S. Yoshida *et al.*, 2017 Regulation  
653 of strigolactone biosynthesis by gibberellin signaling. *Plant Physiol.* 174(2):

- 654 1250–1259.
- 655 Jeong, S. T., N. Goto-Yamamoto, S. Kobayashi, and M. Esaka, 2004 Effects of  
656 plant hormones and shading on the accumulation of anthocyanins and the  
657 expression of anthocyanin biosynthetic genes in grape berry skins. *Plant Sci.* 167(2):  
658 247–252.
- 659 Ji, X. H., Y. T. Wang, R. Zhang, S. J. Wu, M. M. An *et al.*, 2015 Effect of auxin,  
660 cytokinin and nitrogen on anthocyanin biosynthesis in callus cultures of red-fleshed  
661 apple (*Malus sieversii*, f. *niedzwetzkyana*). *Plant Cell Tiss. Org.* 120(1): 325–337.
- 662 Jiang, C and X. Fu, 2007 Phosphate starvation root architecture and anthocyanin  
663 accumulation responses are modulated by the gibberellin-DELLA signaling  
664 pathway in *Arabidopsis*. *Plant Physiol.* 145(4): 1460–70.
- 665 Jiang, Y., C. Liu, D. Yan, X. Wen, Y. Liu *et al.*, 2017 *MdHBI* down-regulation  
666 activates anthocyanin biosynthesis in the white-fleshed apple cultivar ‘Granny  
667 Smith’. *J. Exp. Bot.* 68(5): 1055.
- 668 Lim, S. H., D. H. Kim, J. K. Kim, J.Y. Lee, and S.H. Ha, 2017 A radish basic  
669 helix-loop-helix transcription factor, RsTT8 acts a positive regulator for  
670 anthocyanin biosynthesis. *Front. Plant Sci.* 8: 1917.
- 671 Liu, Z., M. Z. Shi, and D.Y. Xie, 2014 Regulation of anthocyanin biosynthesis in  
672 *Arabidopsis thaliana* red pap1-D cells metabolically programmed by auxins. *Planta*  
673 239(4): 765.
- 674 Livak, K. J. and T.D. Schmittgen, 2001 Analysis of relative gene expression data  
675 using real-time quantitative PCR and the  $2^{-\Delta\Delta C_T}$  method. *Methods* 25: 402–408.
- 676 Loreti, E., G. Povero, G. Novi, C. Solfanelli, A. Alpi *et al.*, 2010 Gibberellins,  
677 jasmonate and abscisic acid modulate the sucrose-induced expression of  
678 anthocyanin biosynthetic genes in *Arabidopsis*. *New Phytol.* 179(4): 1004–1016.
- 679 Lü, P., C. Zhang, J. Liu, X. Liu, G. Jiang *et al.*, 2014 RhHB1 mediates the  
680 antagonism of gibberellins to ABA and ethylene during rose (*Rosa hybrida*) petal  
681 senescence. *Plant J.* 78(4): 578–590.
- 682 Massari, M. E. and C. Murre, 2000 Helix-loop-helix proteins:regulators of  
683 transcription in eucaryotic organisms. *J. Mol. Cell Biol.* 20: 429–440.

- 684 Massonnet, M., M. Fasoli, G. B. Tornielli, M. Altieri, M. Sandri *et al.*, 2017  
685 Ripening transcriptomic program in red and white grapevine varieties correlates  
686 with berry skin anthocyanin accumulation. *Plant Physiol.* 174(4): 2376–2396.
- 687 Gates, D. J., B. Olson, T. E. Clemente, and S.D. Smith, 2018 A novel R3 MYB  
688 transcriptional repressor associated with the loss of floral pigmentation in *Lochroma*.  
689 *New Phytol.* 217(3): 1–11.
- 690 Meng, R., J. Zhang, L. An, B. Zhang, X. Jiang *et al.*, 2016 Expression profiling of  
691 several gene families involved in anthocyanin biosynthesis in apple (*Malus*  
692 *domestica*, Borkh.) skin during fruit development. *J. Plant Growth Regul.* 35(2):  
693 449–464.
- 694 Mortazavi, A., B. A. Williams, K. Mccue, L. Schaeffer, and B. Wold, 2008  
695 Mapping and quantifying mammalian transcriptomes by RNA-Seq. *Nat. Methods* 5:  
696 621–628.
- 697 Petit, R. J. and A. Hampe, 2006 Some evolutionary consequences of being a tree.  
698 *Annu. Rev. Ecol. Evol. S.* 37: 187–214.
- 699 Petroni, K. and C. Tonelli, 2011 Recent advances on the regulation of anthocyanin  
700 synthesis in reproductive organs. *Plant Sci.* 181: 219–229.
- 701 Ramsay, N. A. and B. J. Glover, 2005 MYB-bHLH-WD40 protein complex and the  
702 evolution of cellular diversity. *Trends Plant Sci.* 10: 63–70.
- 703 Shan, X., 2009 Molecular mechanism for jasmonate-induction of anthocyanin  
704 accumulation in *Arabidopsis*. *J. Exp. Bot.* 60(13): 3849–3860.
- 705 Stracke, R., H. Ishihara, G. Huep, A. Barsch, F. Mehrtens *et al.*, 2007 Differential  
706 regulation of closely related R2R3-MYB transcription factors controls flavonol  
707 accumulation in different parts of the *Arabidopsis thaliana* seedling. *Plant J.* 50:  
708 660–677.
- 709 Tamagnone, L., A. Merida, A. Parr, S. Mackay, F. A. Culianez-Macia *et al.*, 1998  
710 The AmMYB308 and AmMYB330 transcription factors from *Antirrhinum* regulate  
711 phenylpropanoid and lignin biosynthesis in transgenic tobacco. *Plant Cell* 10:  
712 135–154.
- 713 Telias, A., K. Linwang, D. E. Stevenson, J. M. Cooney, R. P. Hellens *et al.*, 2011



714 Apple skin patterning is associated with differential expression of *MYB10*. BMC  
715 Plant Biol. 11(1): 93.

716 Vasudevan, H. N., P. Mazot, F. He and P. Soriano, 2015 Receptor tyrosine kinases  
717 modulate distinct transcriptional programs by differential usage of intracellular  
718 pathways. eLife 4: e07186.

719 Vogt, T., 2010 Phenylpropanoid biosynthesis. Mol. Plant 3: 2–20.

720 Wan, S., C. Li, X. Ma, and K. Luo, 2017 PtrMYB57 contributes to the negative  
721 regulation of anthocyanin and proanthocyanidin biosynthesis in poplar. Plant Cell  
722 Rep. 36(8): 1–14.

723 Wang, Y., P. Chen, L. Sun, Q. Li, S. Dai *et al.*, 2015 Transcriptional regulation of  
724 *PaPYLs*, *PaPP2Cs* and *PaSnRK2s* during sweet cherry fruit development and in  
725 response to abscisic acid and auxin at onset of fruit ripening. Plant Growth Regul.  
726 75(2): 455–464.

727 Williams, R. S. and N. Benkeblia, 2018 Biochemical and physiological changes of  
728 star apple fruit (*Chrysophyllum cainito*), during different “on plant” maturation and  
729 ripening stages. Sci. Hortic. 236: 36–42.

730 Xu, Y., S. Feng, Q. Jiao, C. Liu, W. Zhang *et al.*, 2012 Comparison of *MdMYB1*  
731 sequences and expression of anthocyanin biosynthetic and regulatory genes  
732 between *Malus domestica* Borkh. cultivar ‘Ralls’ and its blushed sport. Euphytica  
733 185: 157–170.

734 Zenoni, S., M. Fasoli, F. Guzzo, S. Dal Santo, A. Amato *et al.*, 2016 Disclosing the  
735 molecular basis of the postharvest life of berry in different grapevine genotypes.  
736 Plant Physiol. 172: 1821–1843.

737 Zhang, Y., E. Butelli, R. De Stefano, H. Schoonbeek, A. Magusin *et al.*, 2013  
738 Anthocyanins double the shelf life of tomatoes by delaying overripening and  
739 reducing susceptibility to gray mold. Curr. Biol. 23: 1094–1100.

740

#### 741 **Figure legends**

742 **Figure 1** A, Close-up views of ‘Red Delicious’ and its four generation mutants  
743 (‘Starking Red’, ‘Starkrimson’, ‘Campbell Redchief’ and ‘Vallee spur’), named G0 to

744 G4, at three developmental stages (S1–S3) used for anthocyanin quantification,  
745 transcriptome profiling and qRT-PCR. B, The changes in total anthocyanin  
746 concentrations in the pericarp of the five strains at S1 to S3. Changes in endogenous  
747 hormone levels, including IAA (C), GA (D) and ABA (E), in the pericarp of the five  
748 strains at S1 to S3. Values are means  $\pm$  SE. Different lower case letters indicate  
749 significant differences among the five strains ( $P=0.05$ ).

750

751 **Figure 2** Summary of the number of differentially expressed genes (DEGs) identified  
752 by RNA-seq analysis in the pericarp tissues of ‘Red Delicious’ and its four generation  
753 mutants (‘Starking Red’, ‘Starkrimson’, ‘Campbell Redchief’ and ‘Vallee spur’) at S2,  
754 named G0 to G4. The number of total DEGs (A), up-regulated DEGs (B), and  
755 down-regulated DEGs (D) are presented by Venn diagrams (FDR < 0.01 and fold  
756 change  $\geq$  2). D, Number of total up-regulated and down-regulated DEGs. The  
757 histogram represents the number of commonly down-regulated (blue) and  
758 up-regulated (yellow) DEGs.

759

760 **Figure 3** Gene expression profiles and KEGG category distribution of the DEGs in  
761 the six common expression clusters composing the pericarp transcriptome at S2.  
762 Clusters were derived by coupled clustering analysis of the 3,466 commonly  
763 modulated genes. A, Heat map of the overall common expression pattern. B, Each line  
764 represents the log<sub>2</sub>-transformed average of the mean FPKM values for an individual  
765 transcript. Significantly overrepresented KEGG categories are represented by red dots.  
766 KEGG category enrichment was computed using the R language, Cluster package,  
767 Biobase package, and Q-value package ( $P \leq 0.01$ ).

768

769 **Figure 4** A, Differential expression of genes involved in phenylpropanoid/flavonoid  
770 biosynthesis pathway hormone signal transduction pathway in ‘Red Delicious’ and its  
771 four generation mutants (‘Starking Red’, ‘Starkrimson’, ‘Campbell Redchief’ and  
772 ‘Vallee spur’), named G0 to G4. Differential expression of transcription factors that  
773 encode myb-like (B) and helix-loop-helix (C) DNA-binding domains. Heat maps

774 depict the normalized gene expression values, which represent the means  $\pm$  SD of  
775 three biological replicates. Expression values of five libraries are presented as FPKM  
776 normalized  $\log_{10}$ -transformed counts.

777

778 **Figure 5** Differential expression of genes involved in sesquiterpenoid and  
779 triterpenoid/terpenoid biosynthesis coupled with hormone signal transduction  
780 pathway in ‘Red Delicious’ and its four generation mutants (‘Starking Red’,  
781 ‘Starkrimson’, ‘Campbell Redchief’ and ‘Vallee spur’), named G0 to G4. Heat maps  
782 depict the normalized gene expression values, which represent the means  $\pm$  SD of  
783 three biological replicates. Expression values of five libraries are presented as FPKM  
784 normalized  $\log_{10}$ -transformed counts.

785

786 **Figure 6** Relationships between total anthocyanin contents and transcript levels of the  
787 sixteen representative genes from Figures 4 and 5. For each accession, the expression  
788 was determined in three developmental stages (S1 to S3) of pericarp tissues. For the  
789 qRT-PCR assay, the mean was calculated from three biological replicates, each with  
790 three technical replicates ( $n=9$ ). These replicates were then normalized relative to the  
791 expression of *MdGADPH*. The x-axis in each chart is the same and represents  
792 different *Malus* accessions, as indicated by names in the bottom panel, which are  
793 arranged in different clusters. The left y-axis represents relative expression levels  
794 determined by qRT-PCR.

795

## 796 **Supporting information**

797 Additional Supporting Information may be found online in the supporting information  
798 tab for this article:

799 **Figure S1** Summary of the number of differentially expressed genes (DEGs)  
800 identified by RNA-seq analysis in the pericarp tissues of ‘Red Delicious’ and its four  
801 generation mutants (‘Starking Red’, ‘Starkrimson’, ‘Campbell Redchief’ and ‘Vallee  
802 spur’) at S2, named G0 to G4. The number of total DEGs (A), up-regulated DEGs (B),  
803 and down-regulated DEGs (D) are presented by Venn diagrams (FDR < 0.01 and fold

804 change  $\geq 2$ ). D, Number of total up-regulated and down-regulated DEGs. The  
805 histogram represents the number of commonly down-regulated (blue) and  
806 up-regulated (yellow) DEGs.

807 **Table S1** Summary of RNA-Seq data and mapping metrics

808 **Table S2** Gene ontology (GO) enrichment analyses for DEGs in ‘Red Delicious’ and  
809 its four generation mutants.

810 **Table S3** Sequence of primers used for qRT-PCR analysis.

811

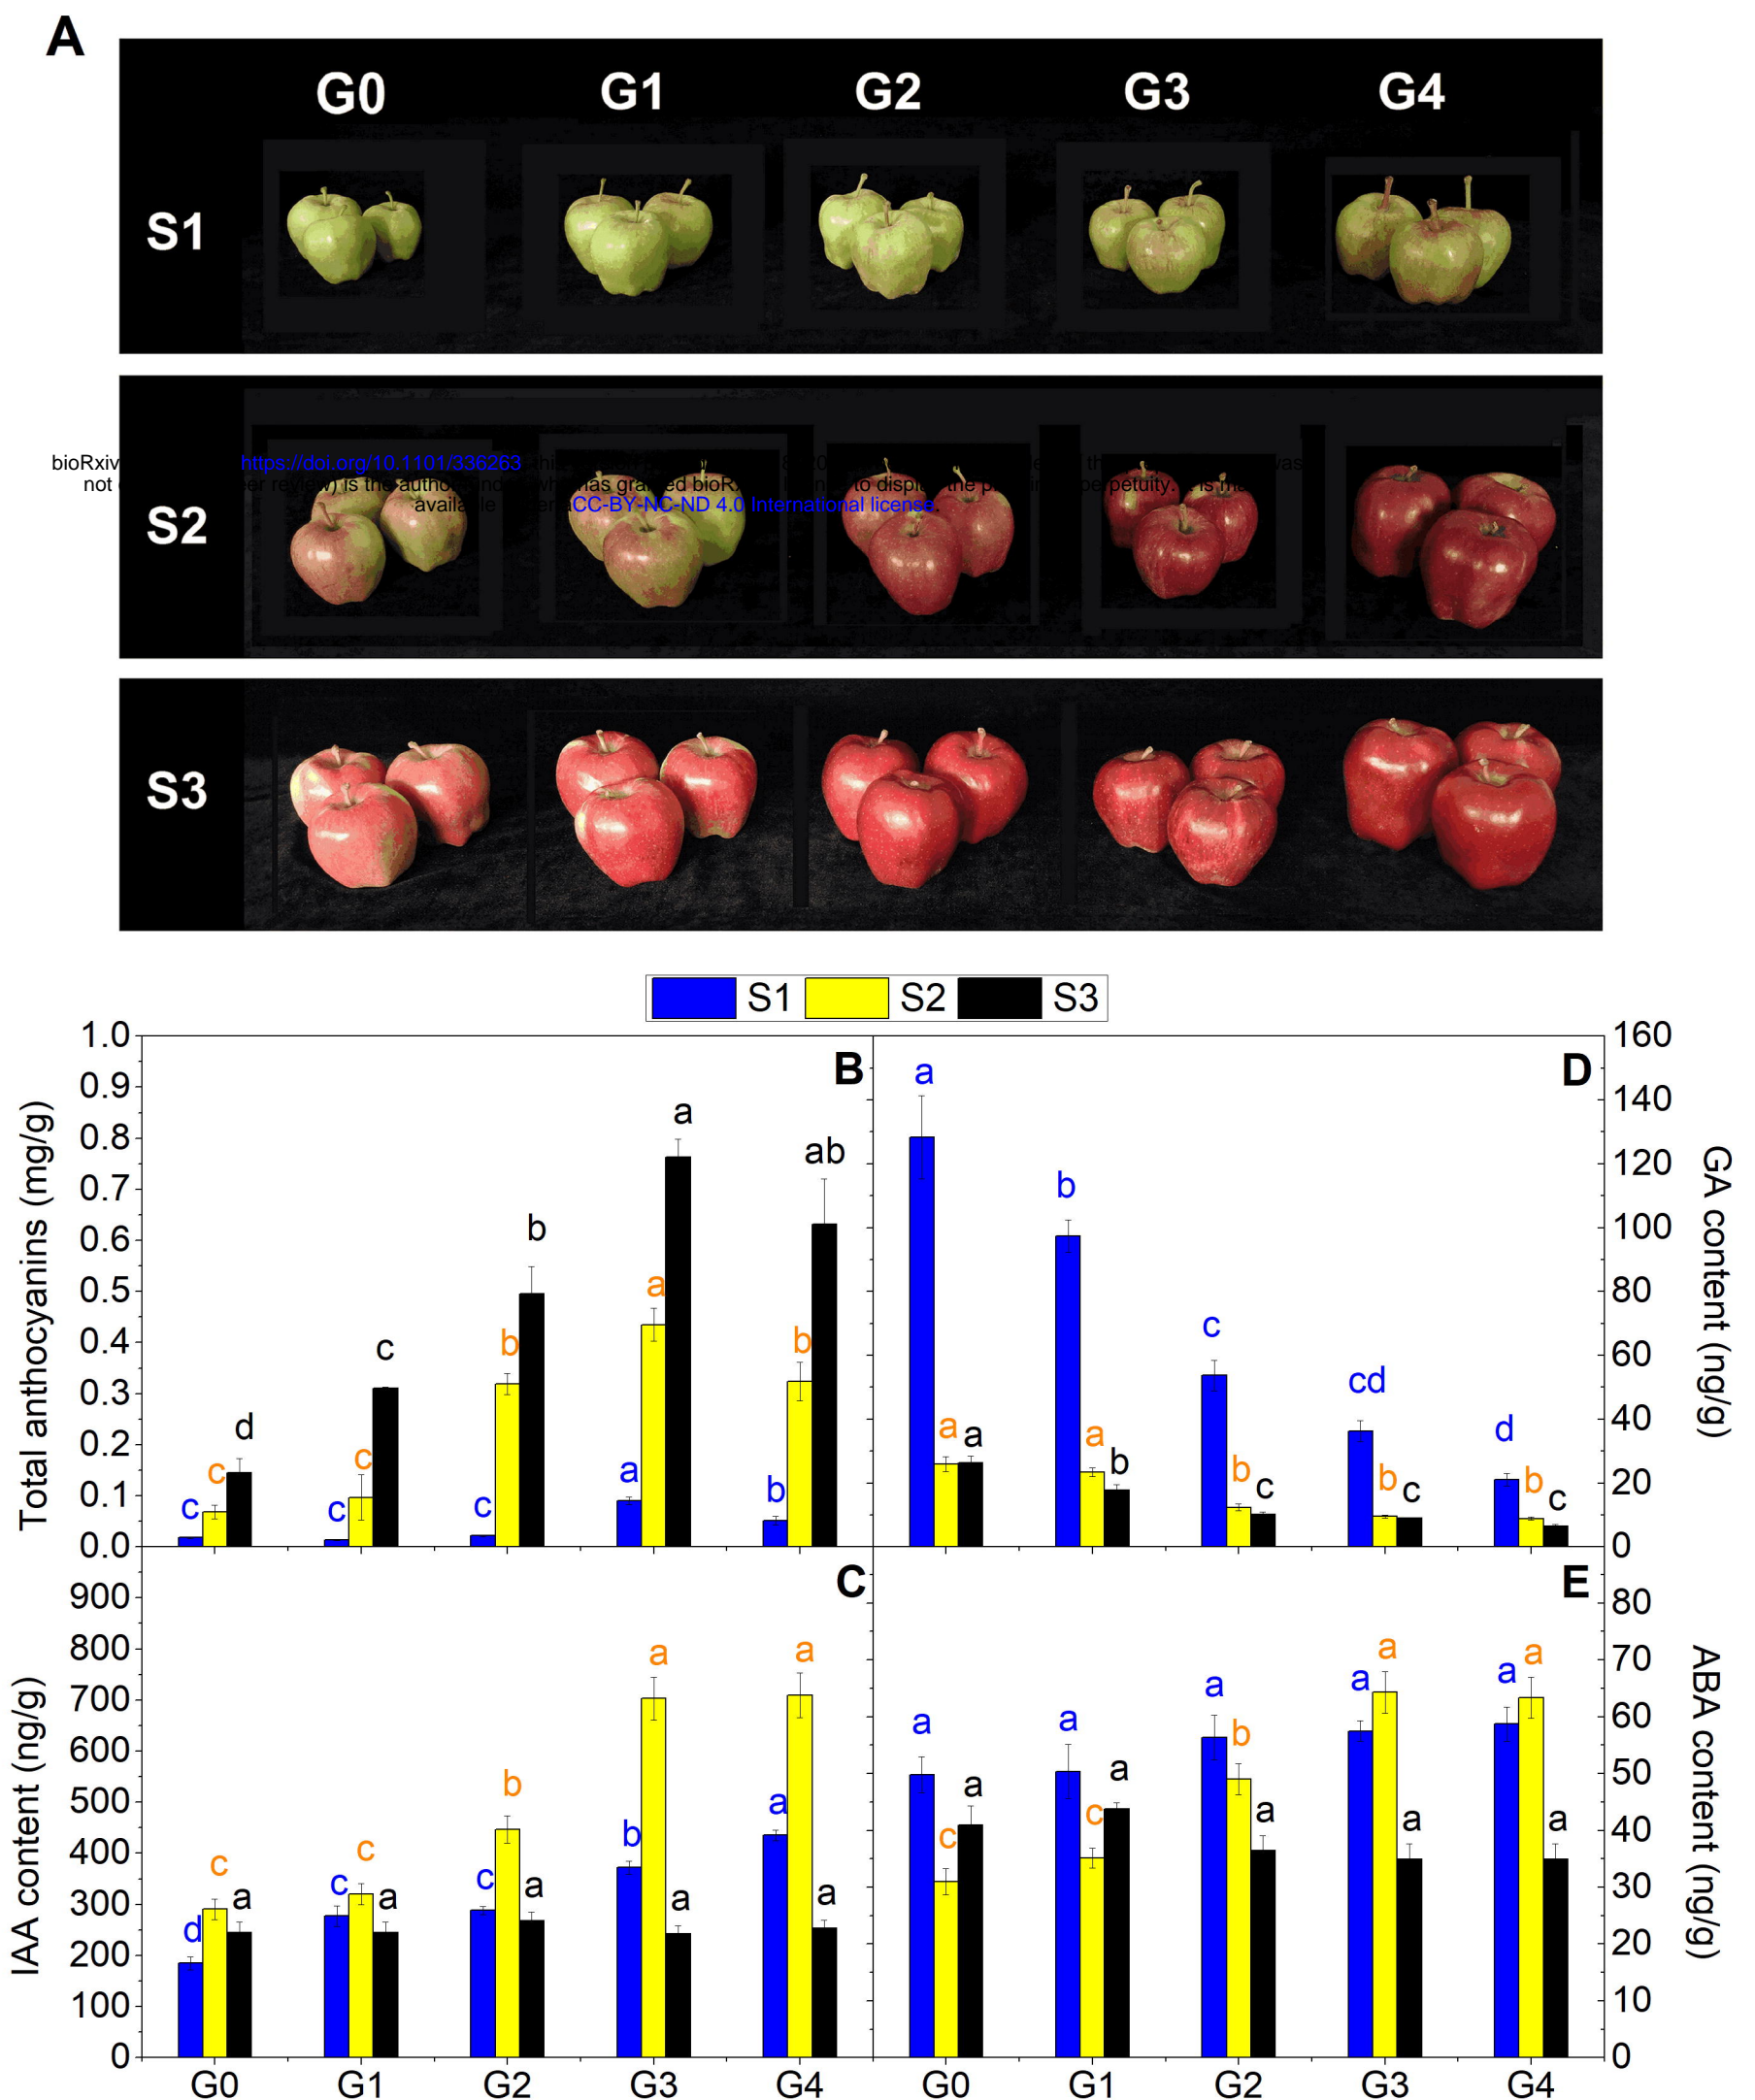

**Figure 1.** A, Close-up views of 'Red Delicious' and its four generation mutants ('Starking Red', 'Starkrimson', 'Campbell Redchief' and 'Vallee spur') fruit named as G0 to G4 at three developmental stages (S1-S3) used for anthocyanin quantification, transcriptome profiling and qRT-PCR. B, The changes of total anthocyanin concentrations in the pericarp of the five strains at S1 to S3. The changes of endogenous hormone levels including IAA (C), GA (D) and ABA (E) in the pericarp of the five strains at S1 to S3. Values are means  $\pm$  SE. Different lower case letters indicate the significant differences among the five strains ( $P = 0.05$ ).

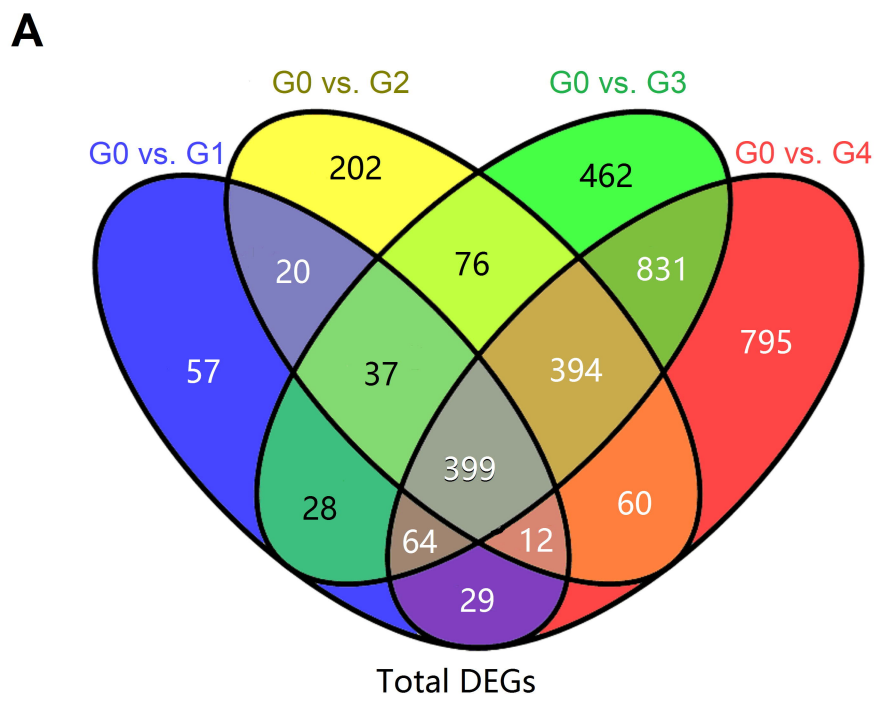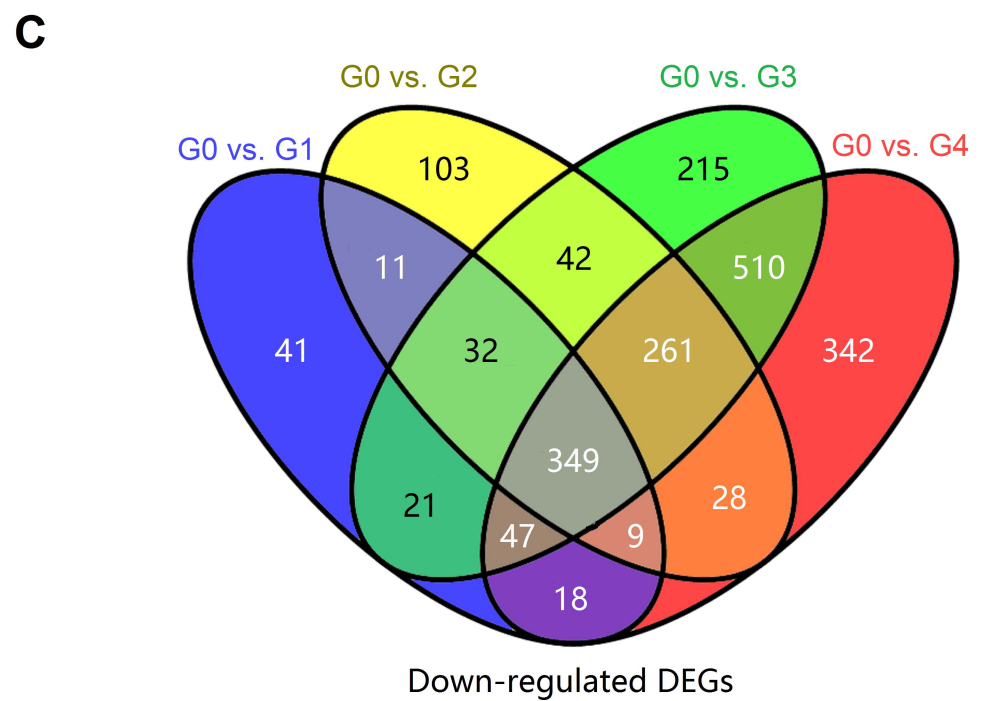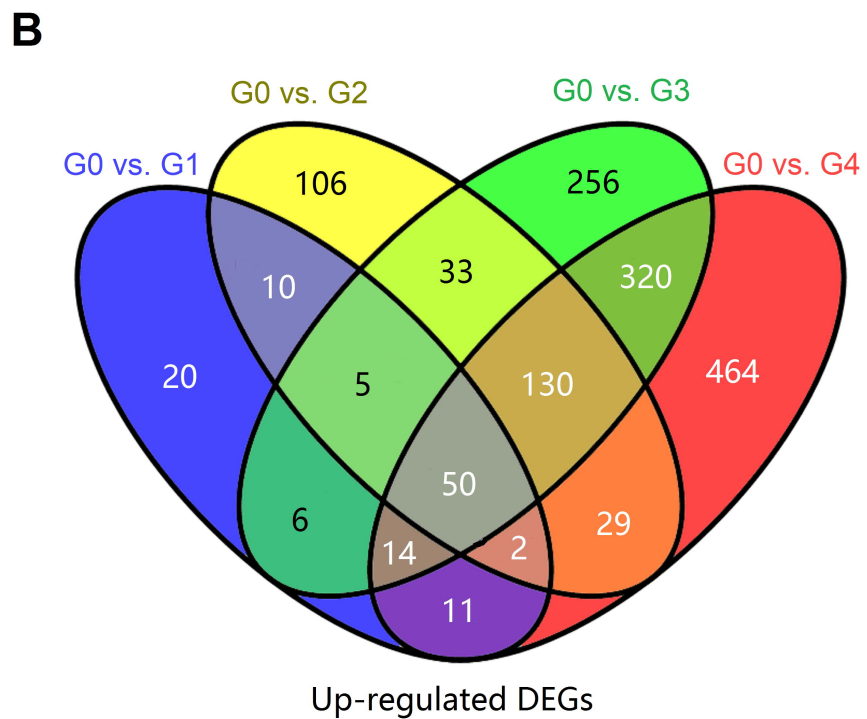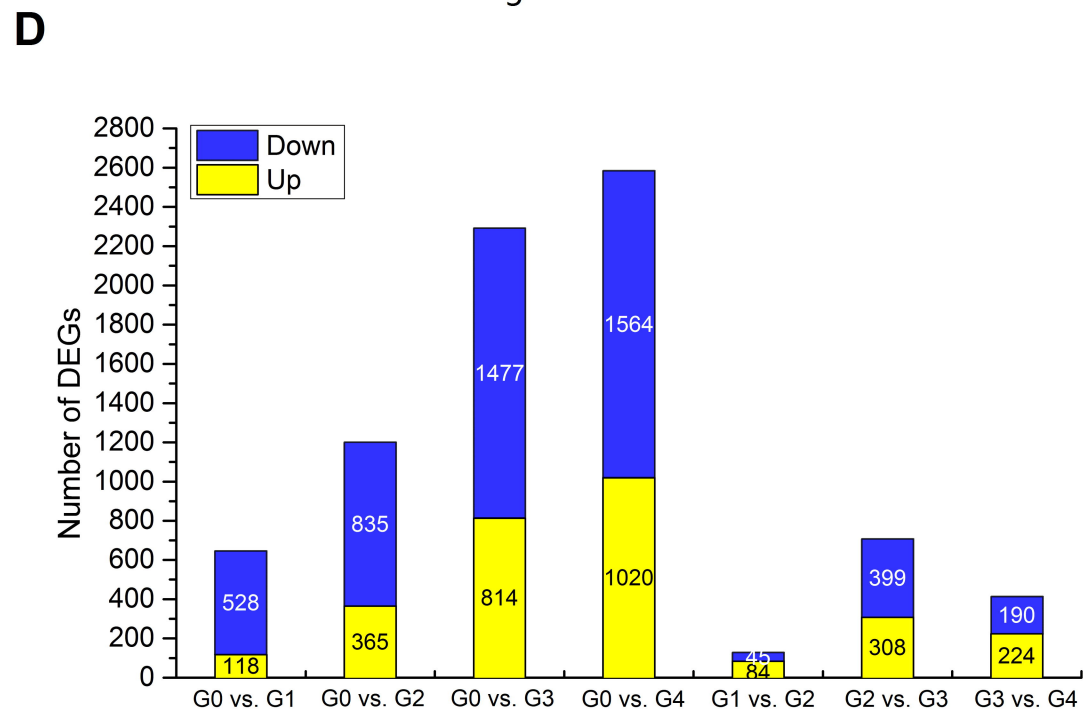

**Figure 2.** Summary of the number of differentially expressed genes (DEGs) identified by RNA-seq analysis in the pericarp tissues of 'Red Delicious' and its four generation mutants ('Starking Red', 'Starkrimson', 'Campbell Redchief' and 'Vallee spur') at S2, named as G0 to G4. Number of total DEGs (A), up-regulated DEGs (B), down-regulated DEGs (D) were presented by Venn diagrams (FDR < 0.01 and fold change  $\geq 2$ ). D, Number of total up-regulated and down-regulated DEGs. The histogram represents the number of commonly down-regulated (blue) and up-regulated (yellow) DEGs.

A

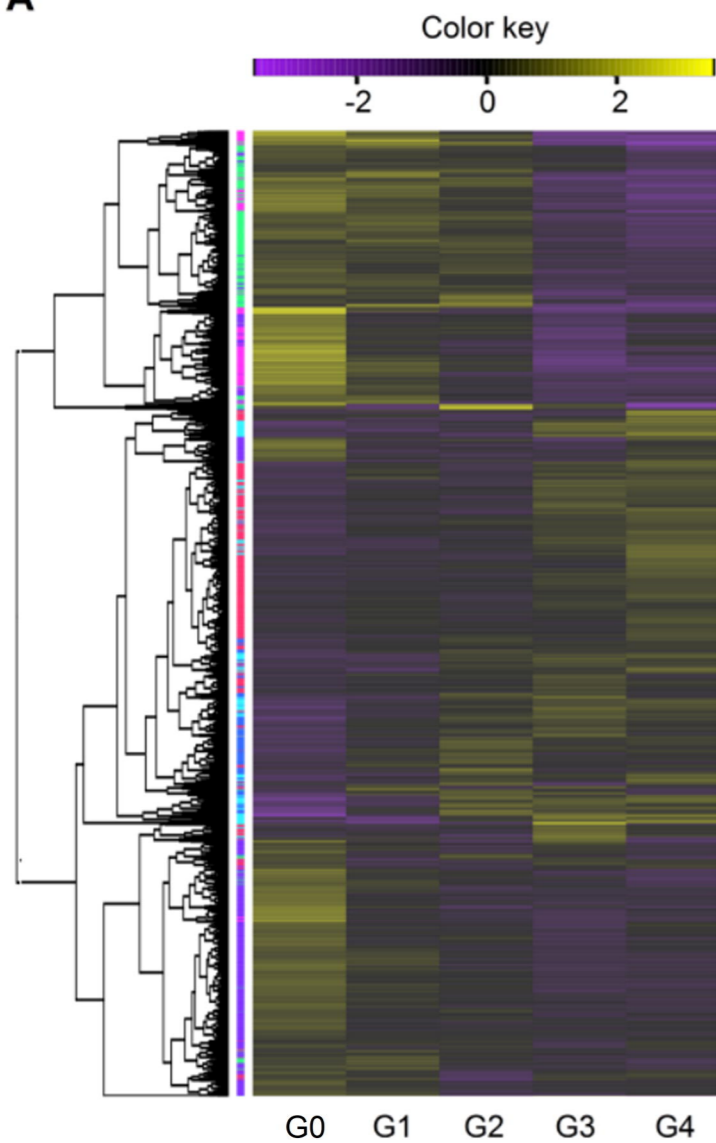

B

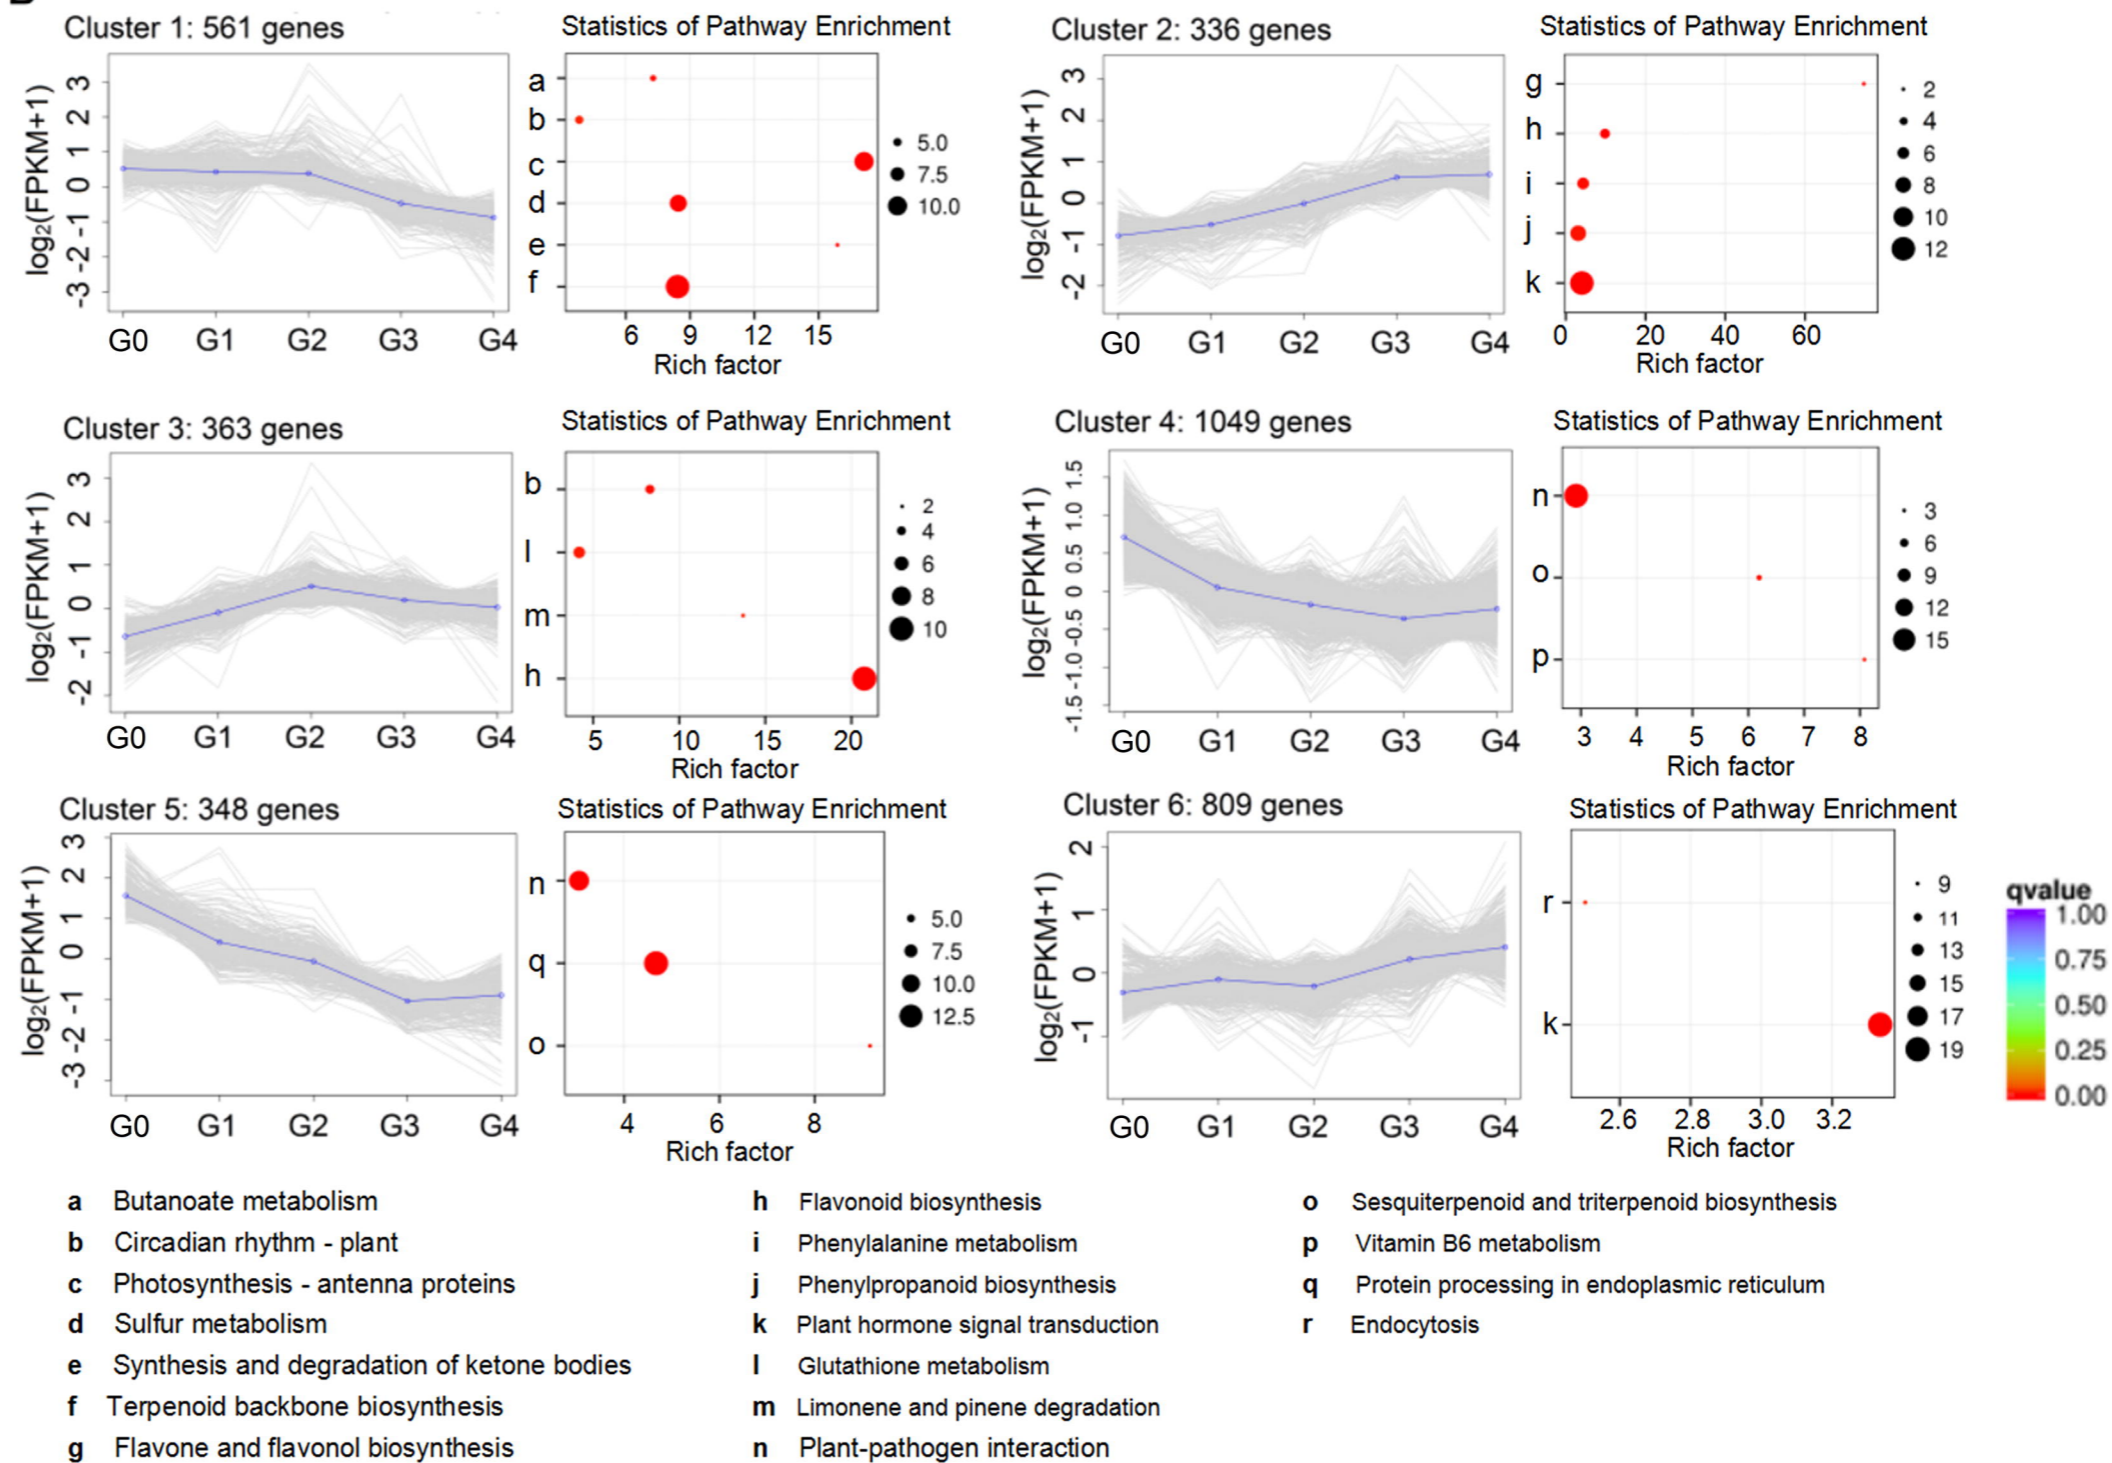

**Figure 3.** Gene expression profiles and KEGG category distribution of the DEGs in the six common expression clusters composing the pericarp transcriptome at S2. Clusters were derived by coupled clustering analysis of the 3,466 commonly modulated genes. A, Heat map of the overall common expression pattern. B, Each single line represents the  $\log_2$ -transformed average of the mean FPKM values for an individual transcript. Significantly overrepresented KEGG categories are represented by red dot. KEGG category enrichment was computed using R language, Cluster package, Biobase package, and Q-value package ( $P \leq 0.01$ ).





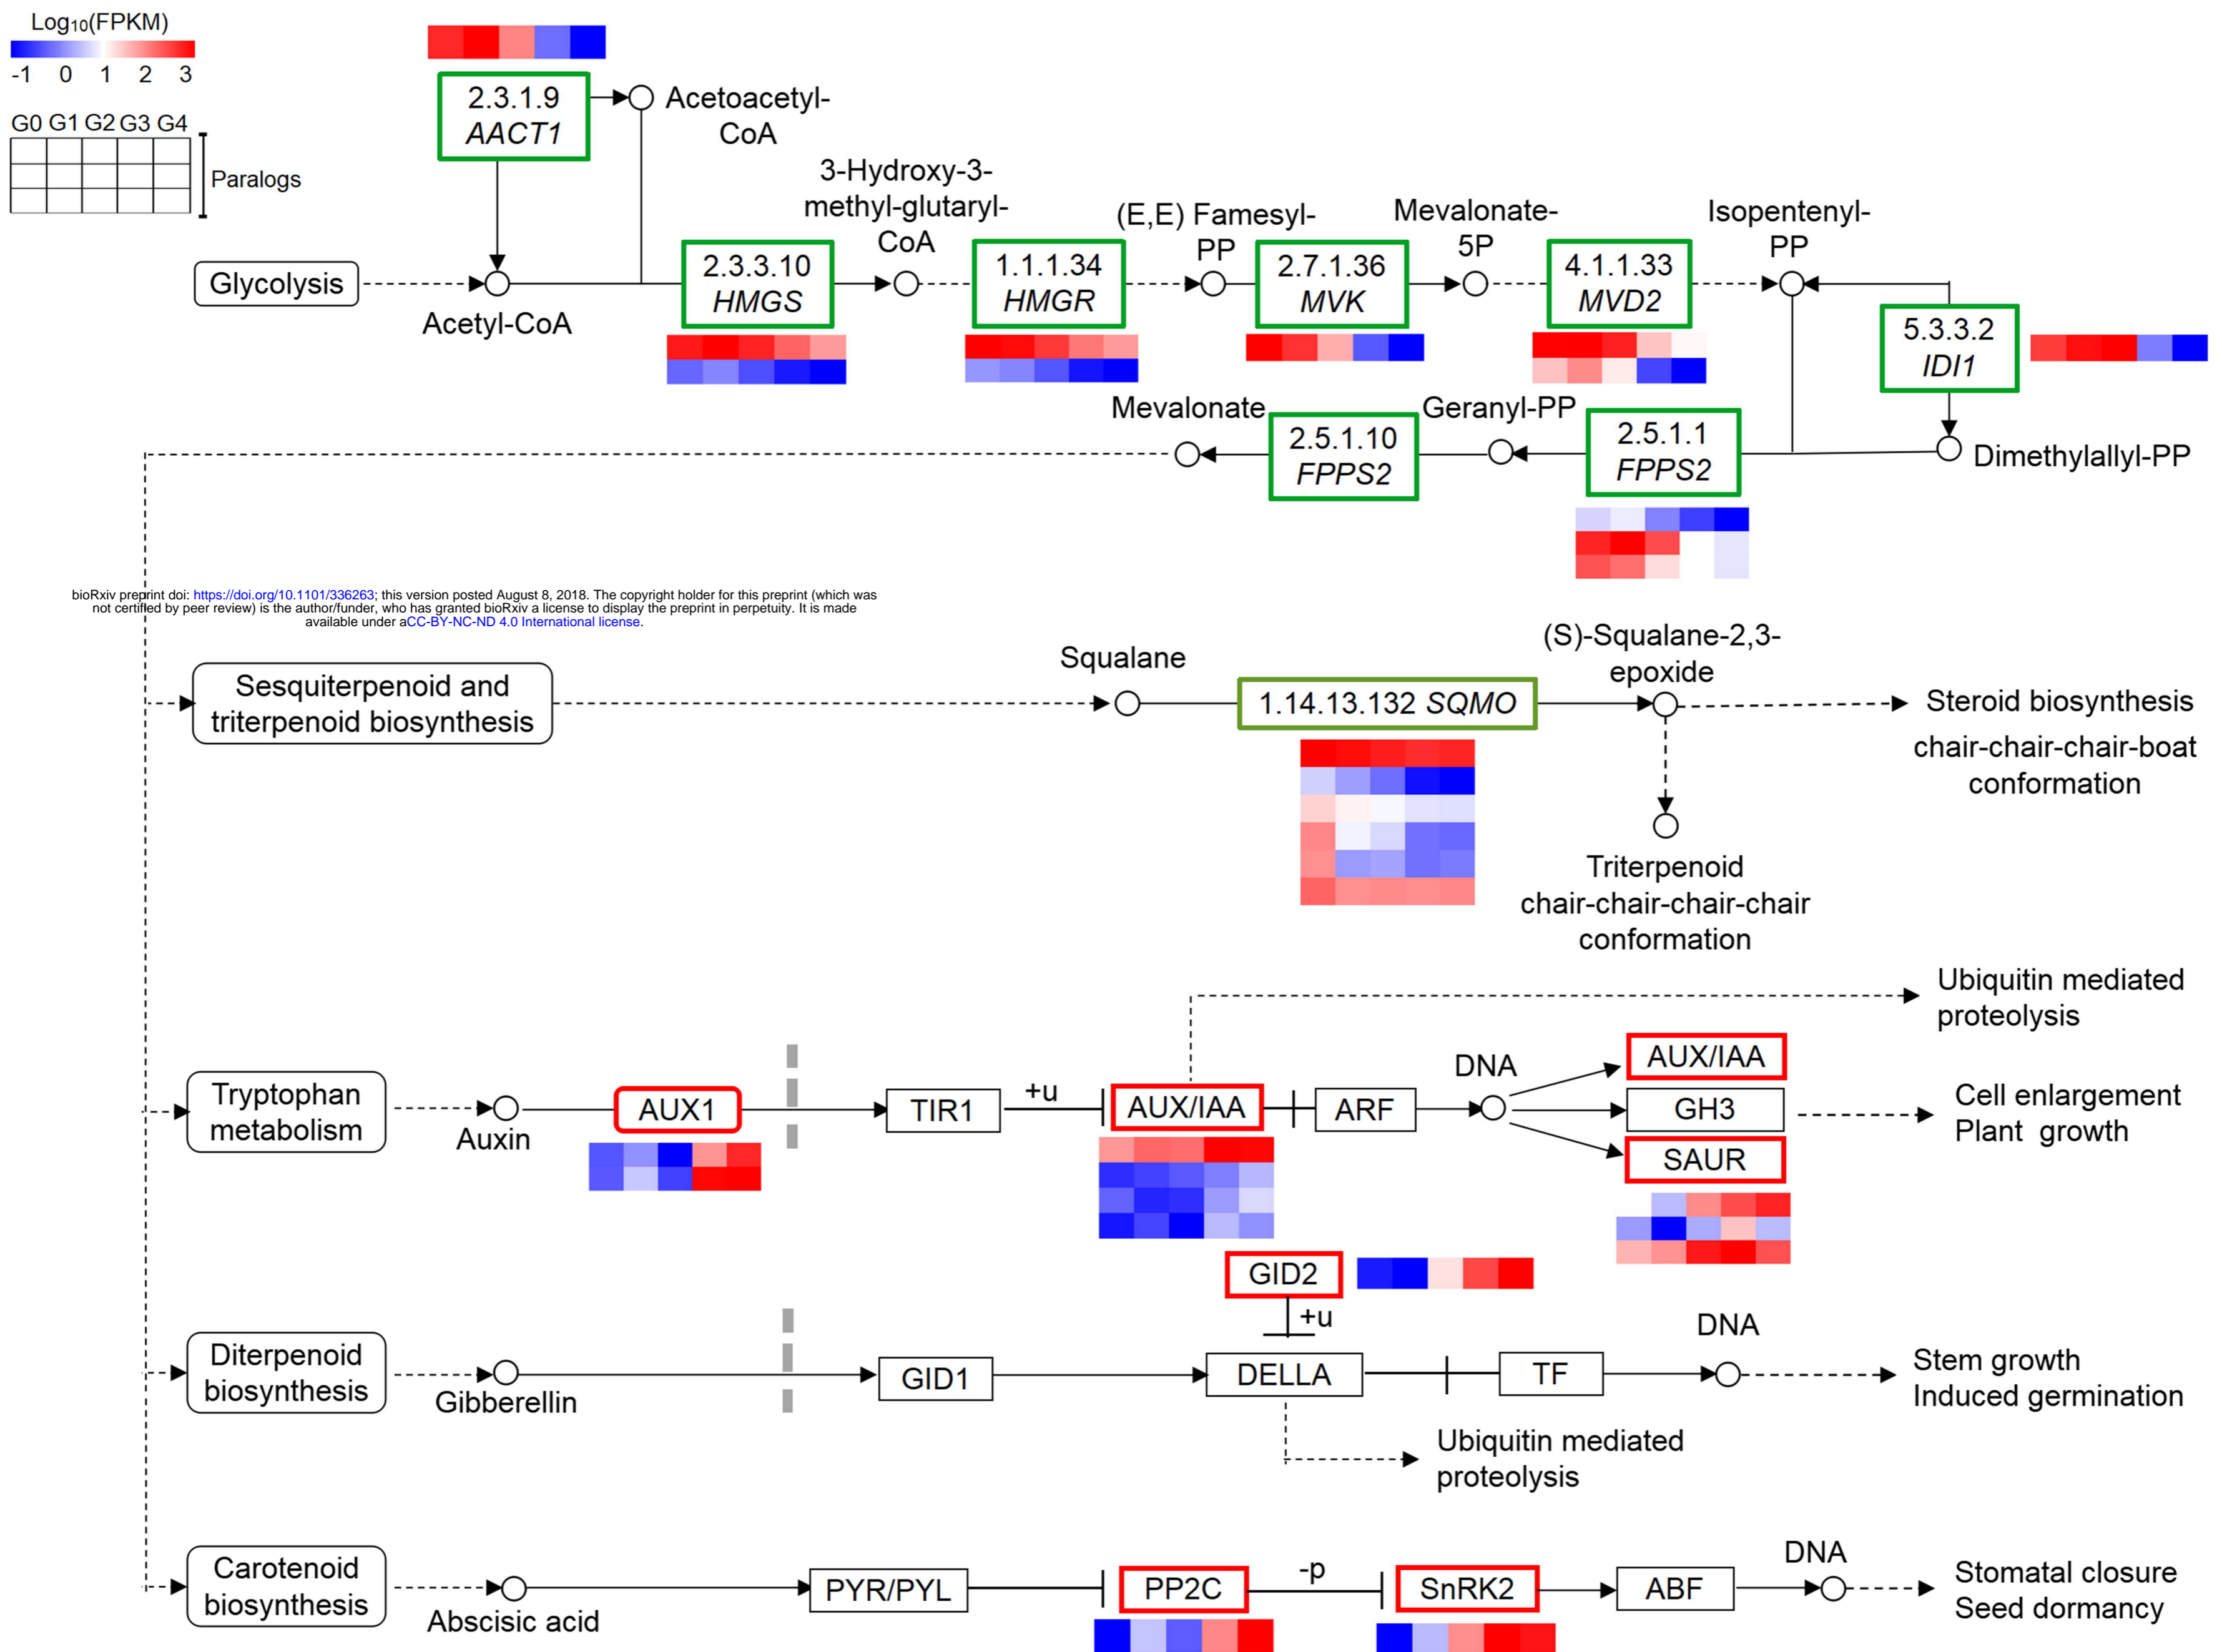

**Figure 5.** Differential expression of genes involved in sesquiterpenoid and triterpenoid/terpenoid biosynthesis coupled with hormone signal transduction pathway in ‘Red Delicious’ and its four generation mutants ('Starking Red', 'Starkrimson', 'Campbell Redchief' and 'Vallee spur') named as G0 to G4. Heatmaps depict the normalized gene expression values, which represent means  $\pm$ SD of three biological replicates. Expression values of five libraries are presented as FPKM normalized log<sub>10</sub>-transformed counts.

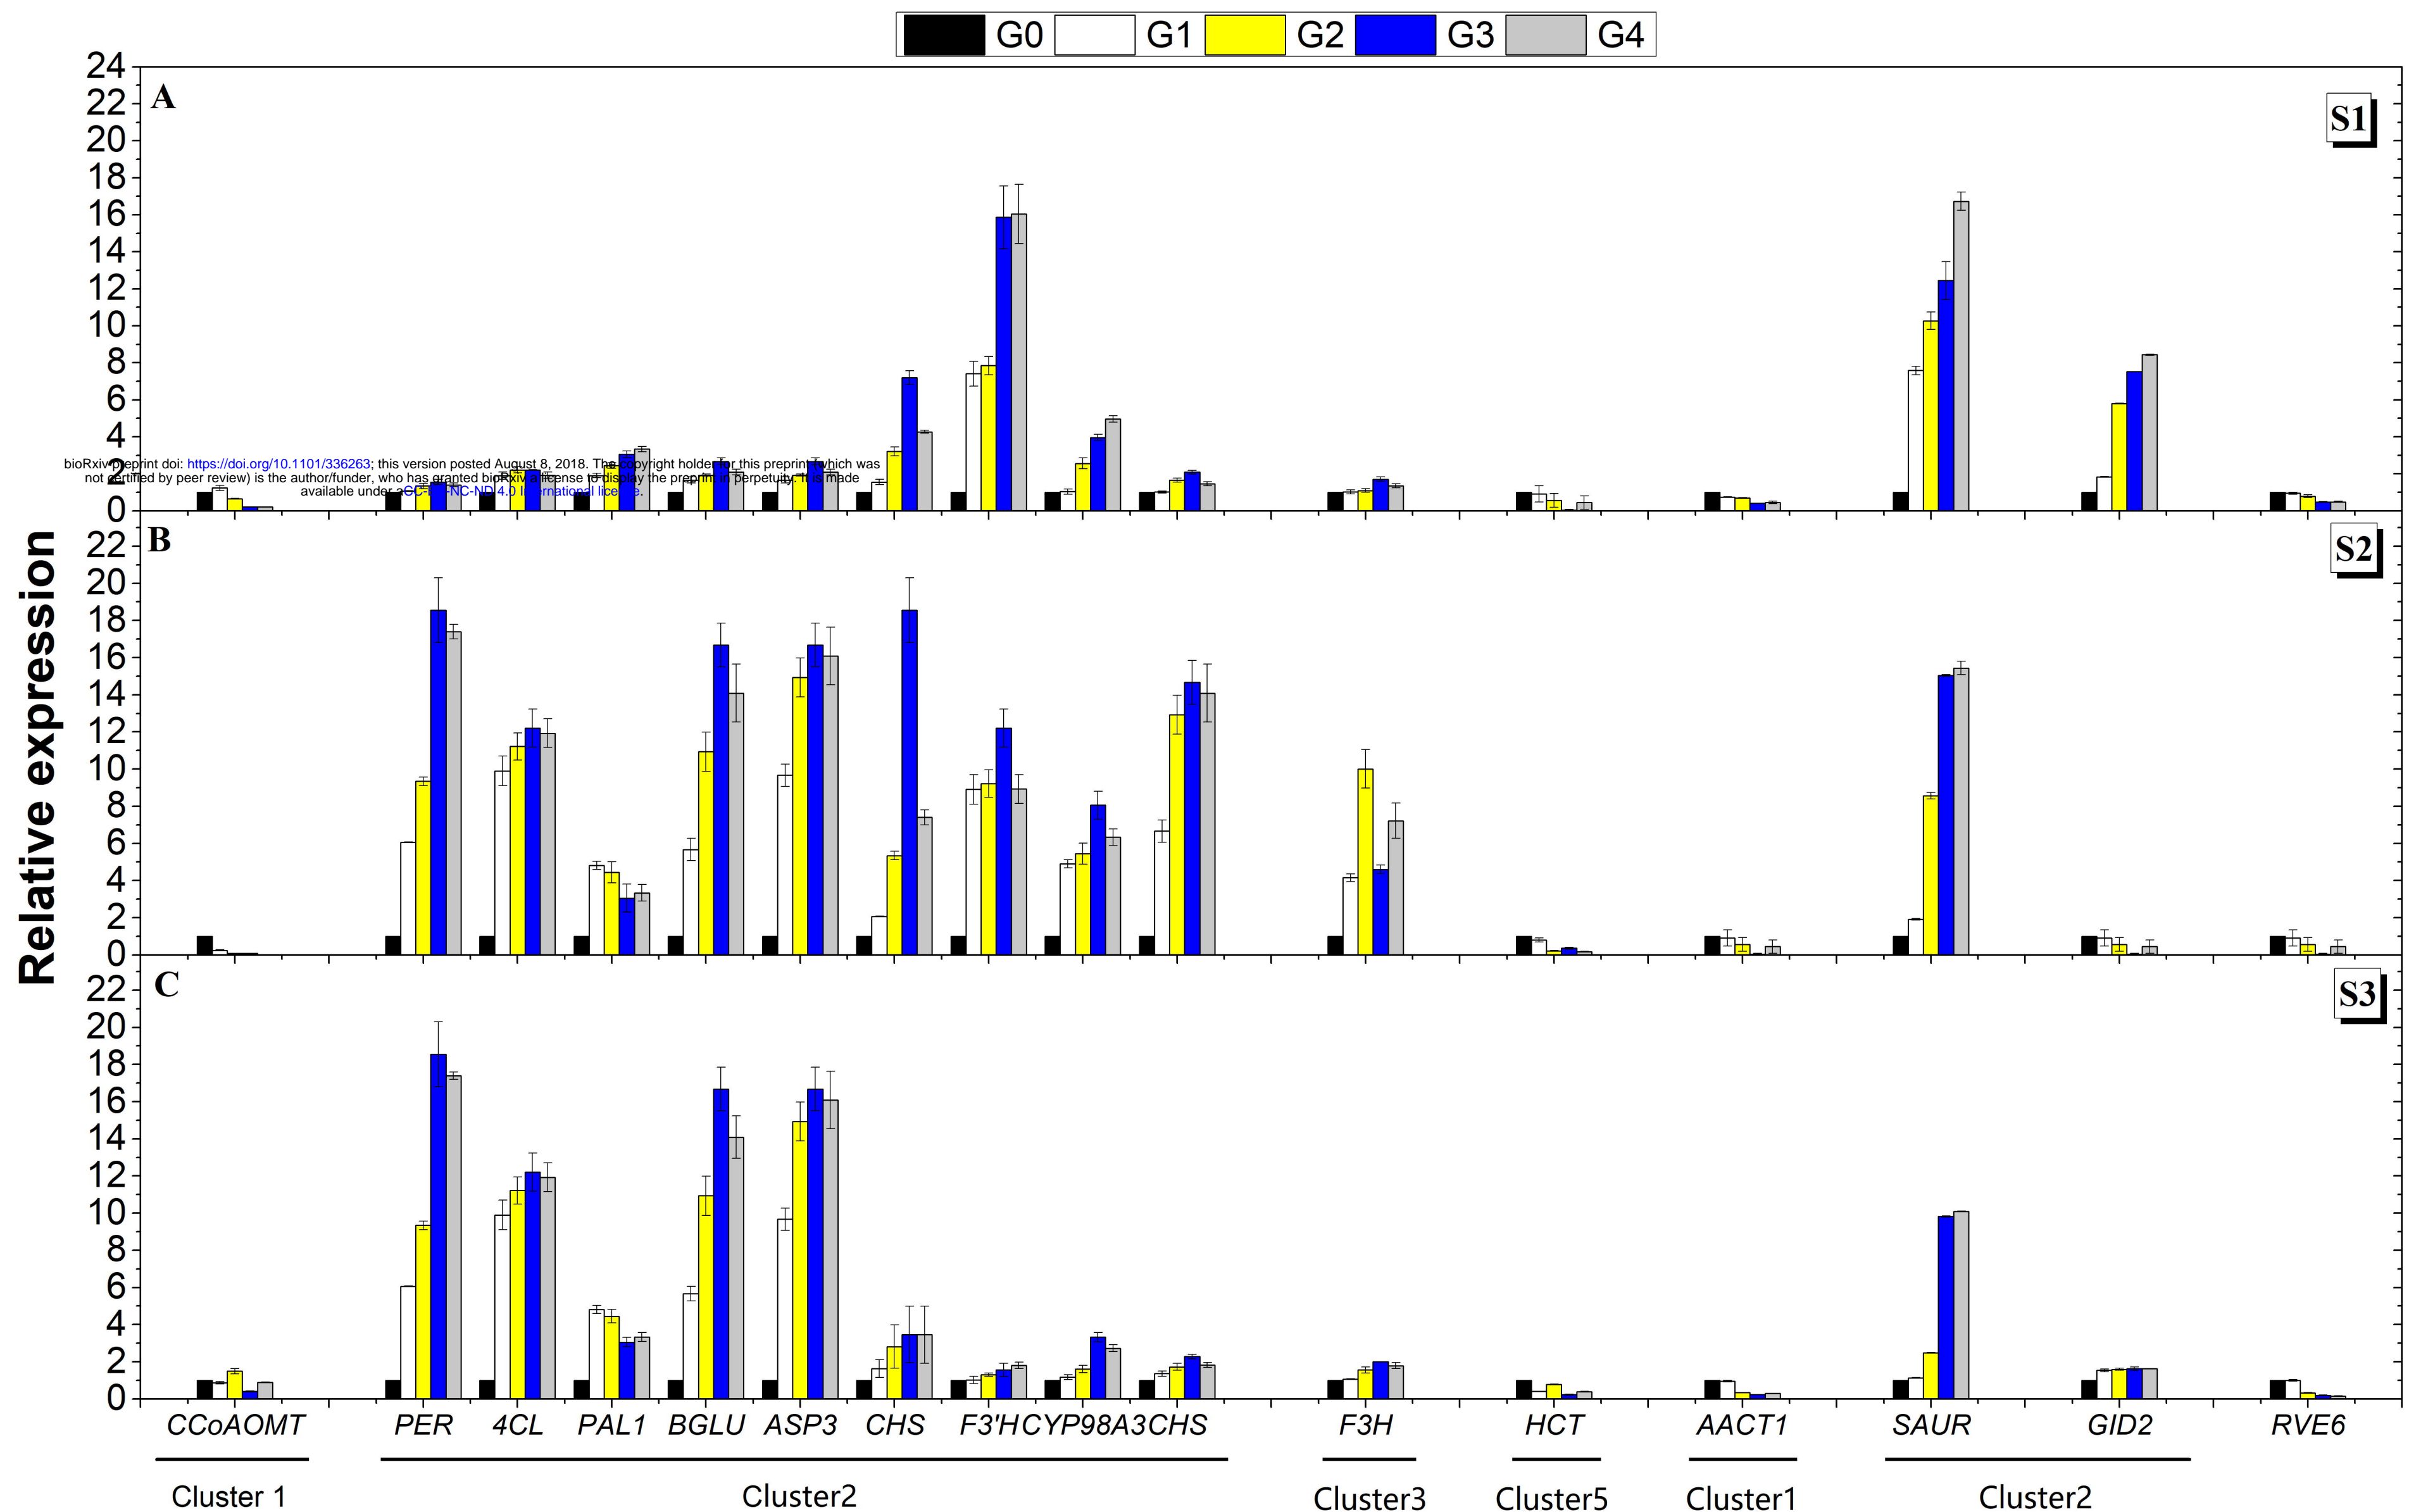

**Figure 6.** Relationships between total anthocyanin contents and transcript levels of the sixteen representative genes from Fig. 4 and 5. For each accession, the expression was determined in three developmental stages (S1 to S3) of pericarp tissues. For qRT-PCR assay, the mean was calculated from three biological replicates each with three technical replicates ( $n=9$ ). These were then normalized relative to the expression of *MdGADPH*. The x-axis in each chart is the same and represents different *Malus* accessions as indicated by names at the bottom panel, which are arranged in different clusters. The left y-axis represents relative expression levels determined by qRT-PCR.
